# Supplementary material for: SWATH Mass Spectrometry-Based CSF Proteome Profile of GBA-Linked Parkinson’s Disease Patients
Source: MDPI journal article supplement (doi:10.3390/ijms232214166), 2022-11-16
Supplement: s1 [file s1]

**Supplementary File S1:** Raw data for the proteins identified via SWATH-MS;

**Supplementary File S2:** Raw quantitative data for the identified proteins.

**Supplementary Figure S1:** Panther-based functional categorization of identified CSF proteins. The graphs depict (A) pathways and (B) biological process manipulated by identified proteins along with their (C) functional class and (D) cellular origin;

**Supplementary Figure S2:** Relative CSF concentrations of the proteins differentially regulated in PD<sub>GBA</sub> cases only. The graphs depict the relative amount of (A) Clusterin, (B) Complement C6, (C) Galectin-3-binding protein, (D) B4GALT1, (E) Neurotrimin, (F) Receptor-type tyrosine-protein phosphatase delta, (G) Alpha-1-acid glycoprotein 2, (H) Plasma protease C1 inhibitor, (I) Fibronectin, (J) Sulfhydryl oxidase 1, (K) Seizure 6-like protein, (L) Neural cell adhesion molecule 1, (M) Prostaglandin-H2, (N) Neural cell adhesion molecule, (O) Fibulin 5, (P) Reticulon-4 receptor, (Q) Fibulin 1, (R) Antithrombin-III, (S) Isoform 2 of Amyloid-like protein 1, and (T) Alpha-mannosidase 2× in HI, PD<sub>Idiopathic</sub> and PD<sub>GBA</sub> cases. One-way ANOVA, followed by Tukey's multiple comparisons test, was used for statistical analysis. Error bars represent SEM. (\* =  $p \leq 0.05$ ; \*\* =  $p \leq 0.01$ ; \*\*\* =  $p \leq 0.001$ );

**Supplementary Figure S3:** Relative CSF concentrations of the proteins differentially regulated in PD<sub>Idiopathic</sub> cases only. The graphs depict the relative amount of (A) Beta-hexosaminidase subunit beta and (B) Extracellular superoxide dismutase in HI, PD<sub>Idiopathic</sub> and PD<sub>GBA</sub> cases. One-way ANOVA, followed by Tukey's multiple comparisons test, was used for statistical analysis. Error bars represent SEM. (\* =  $p \leq 0.05$ ; \*\* =  $p \leq 0.01$ ; \*\*\* =  $p \leq 0.001$ ; \*\*\*\* =  $p \leq 0.0001$ );

**Supplementary Figure S4:** Relative CSF concentrations of the proteins differentially regulated in both PD<sub>Idiopathic</sub> and PD<sub>GBA</sub> cases. The graphs depict the relative amount of (A) Procollagen C-endopeptidase enhancer 1, (B) Contactin-2, (C) Cell surface glycoprotein MUC18, (D) Aspartate aminotransferase, (E) Pyruvate kinase, (F) Gelsolin, (G) Neural cell adhesion molecule 2, (H) Ephrin type-A receptor 4, (I) L-Lactate dehydrogenase, (J) Transcobalamin-2, (K) Neural cell adhesion molecule L1-like and (L) Alpha-2-macroglobulin in HI, PD<sub>Idiopathic</sub> and PD<sub>GBA</sub> cases. One-way ANOVA, followed by Tukey's multiple comparisons test, was used for statistical analysis. Error bars represent SEM. (\* =  $p \leq 0.05$ ; \*\* =  $p \leq 0.01$ ; \*\*\* =  $p \leq 0.001$ ; \*\*\*\* =  $p \leq 0.0001$ ).
