# Supplementary material for: SWATH Mass Spectrometry-Based CSF Proteome Profile of GBA-Linked Parkinson’s Disease Patients
Source: Int J Mol Sci. 2022 Nov 16;23(22):14166. doi: 10.3390/ijms232214166 (PMC9699576; doi:10.3390/ijms232214166)
Supplement: Supplementary file 1 [file ijms-23-14166-s001.zip]

Archive with 7 entries (7 files):
- Caption.pdf
- Supplementary Figure 1.jpg
- Supplementary Figure 2.jpg
- Supplementary Figure 3.jpg
- Supplementary Figure 4.jpg
- Supplementary File 1.xlsx
- Supplementary File 2.xlsx
