# Supplementary material for: SWATH Mass Spectrometry-Based CSF Proteome Profile of GBA-Linked Parkinson’s Disease Patients
Source: Int J Mol Sci. 2022 Nov 16;23(22):14166. doi: 10.3390/ijms232214166 (PMC9699576; doi:10.3390/ijms232214166)
Supplement: Supplementary file 1 [file ijms-23-14166-s001.zip › Supplementary File 2.xlsx]

## Sheet: Sheet1
		PD																					GBA PD
Protein Name	Accession	PDIdiopathic 1A	PDIdiopathic 1B	Average	PDIdiopathic 2A	PDIdiopathic 2B	Average	PDIdiopathic 3A	PDIdiopathic 3B	Average	PDIdiopathic 4A	PDIdiopathic 4B	Average	PDIdiopathic 5A	PDIdiopathic 5B	Average	PDIdiopathic 6A	PDIdiopathic 6B	Average	PDIdiopathic 7A	PDIdiopathic 7B	Average	PDGBA 1A	PDGBA 1B	Average	PDGBA 2A	PDGBA 2B	Average	PDGBA 3A	PDGBA 3B	Average	PDGBA 4A	PDGBA 4B	Average	PDGBA 5A	PDGBA 5B	Average	PDGBA 6A	PDGBA 6B	Average	PDGBA 7A	PDGBA 7B	Average	PDGBA 8A	PDGBA 8B	Average	PDGBA 9A	PDGBA 9B	Average
Complement C1q subcomponent subunit A (Fragment)	X6RLJ0	2639.49	7044.4	4841.95	1250.81	2424.08	1837.45	4880.74	5968.84	5424.79	20919.4	19690.8	20305.1	5759.26	1377.86	3568.56	5031.45	3850.54	4441	4355.45	2875.08	3615.27	5361.3	16356.6	10859	15663	6061.42	10862.2	6595.31	6991.84	6793.57	6822.12	5019	5920.56	3581.94	2843.53	3212.74	5965.51	401.267	3183.39	5247.56	4007.26	4627.41	5848.95	6686.31	6267.63	3706.88	16776.7	10241.8
Neurofascin (Fragment)	X6RKN2	17610.2	33475.8	25543	20864.4	4578.88	12721.6	19227.6	9978.07	14602.9	51387	55760.5	53573.7	21578.1	36629.6	29103.8	42999.2	39342.3	41170.8	26215.8	17524	21869.9	26401.9	18944.3	22673.1	14648.9	13535.3	14092.1	24871.6	32957.1	28914.3	13481.9	16536.2	15009.1	13800.7	18443.5	16122.1	12901.2	10545.3	11723.2	15958.1	19720.5	17839.3	18558	20301	19429.5	34226.9	43422.8	38824.9
Carboxypeptidase Q	Q9Y646	69292.8	71220.8	70256.8	72885.9	77623.7	75254.8	27288.8	30018.2	28653.5	99925.4	103957	101941	37447.6	39262.8	38355.2	49747.7	49717	49732.3	52265.6	62601.2	57433.4	46989.7	43442.9	45216.3	46241.7	47432.4	46837	65154.6	54436.7	59795.6	33066.6	31868.4	32467.5	51525	48282.6	49903.8	52298.3	52872.4	52585.4	42985.4	51501.9	47243.6	62965.9	60331	61648.5	70025	75601.1	72813.1
Calcium/calmodulin-dependent protein kinase type II subunit alpha	Q9UQM7	1350.08	5215.95	3283.01	3286.18	1054.67	2170.42	4067.08	1804.57	2935.83	1360.1	2556.97	1958.53	1124.62	1634.79	1379.7	3270.7	4634.85	3952.77	5229.3	1991.03	3610.16	1352.69	4961.78	3157.24	1185.26	1609.84	1397.55	1167.81	4269.98	2718.9	2380.75	1302.26	1841.51	1445.49	3702.61	2574.05	3506.65	733.298	2119.97	1093.88	521.068	807.475	3707.9	1065.8	2386.85	7768.61	5828.29	6798.45
Multiple inositol polyphosphate phosphatase 1	Q9UNW1	12796.8	11338.7	12067.8	2174.3	951.853	1563.08	8477.17	10849.6	9663.4	10006	7971.1	8988.57	9600.47	6928.27	8264.37	8361.98	12014.5	10188.3	6192.42	9900.67	8046.54	1184.25	8061.07	4622.66	7630.3	6214.25	6922.28	10578.5	11857	11217.7	5320.71	5649.72	5485.21	7513.27	7415.39	7464.33	7209.86	6557.37	6883.61	9631.43	7330.95	8481.19	382.667	8633.39	4508.03	10305.9	4775.24	7540.59
Catenin alpha-3	Q9UI47	13784.1	13591	13687.5	21341.3	6558.19	13949.7	7992.61	11208.9	9600.73	1487.47	15277.2	8382.34	31721.1	27299.1	29510.1	1238.12	5672.97	3455.55	9918.27	26284.6	18101.4	27549.4	28116.6	27833	18241.6	1490.7	9866.13	4266.51	6738.66	5502.58	30839	27381.5	29110.3	3036.9	20451.6	11744.2	4894.47	23675.5	14285	1127.99	3257.23	2192.61	8811.13	17125.1	12968.1	4975.65	6363.22	5669.44
Dipeptidyl peptidase 2	Q9UHL4	11546.3	13157.8	12352.1	15300.9	21397.3	18349.1	15565.4	17953.3	16759.3	29154.2	18696.3	23925.2	11248.2	10820	11034.1	19680.9	36969.9	28325.4	22722.3	28580.8	25651.6	14554.5	12574.7	13564.6	13382.8	15986.5	14684.7	4713.06	13445.1	9079.08	22927.8	7720.05	15323.9	16061.6	9936.18	12998.9	15554.8	13644.4	14599.6	26637.8	8361.49	17499.6	12208.2	12533.1	12370.7	23041.9	25134.3	24088.1
ProSAAS	Q9UHG2	9821.67	13634.9	11728.3	6158.9	7439.27	6799.08	12252.8	1187.65	6720.23	10511	10466.3	10488.7	13222.4	10698.6	11960.5	11308	2065.51	6686.78	10439.7	14554	12496.8	9080.92	7434.54	8257.73	6455.43	4736.94	5596.18	274.323	15675.2	7974.76	4063.62	4762.5	4413.06	7569.17	836.179	4202.68	5999.62	5722.19	5860.9	5947.79	1260.75	3604.27	7415.07	10311.8	8863.44	9125.01	1015.01	5070.01
Cathepsin Z	Q9UBR2	8600.89	7292.33	7946.61	8345.89	6406.56	7376.22	5933.8	7664.58	6799.19	17446.9	17552.6	17499.7	8091.82	13128	10609.9	10780	13880.6	12330.3	14515.1	17582.1	16048.6	4441.98	1796.84	3119.41	4521.69	6712.57	5617.13	13499.3	3029.57	8264.41	2022.41	2740.12	2381.26	9660.07	2641.95	6151.01	11249.5	13844.4	12547	6193.75	4622.36	5408.05	2048.84	2563.71	2306.28	7448.56	8587.65	8018.11
Isoform 2a of Neurexin-2	Q9P2S2-2	117068	97562.2	107315	52356.1	33095.3	42725.7	38837.3	108300	73568.7	72020	72147	72083.5	90718.2	49326.1	70022.2	41971.7	39352.4	40662.1	32943.8	65213.2	49078.5	45649.6	41966.6	43808.1	25931.6	33558	29744.8	50449.3	52670.4	51559.8	8514	31141.4	19827.7	40198	40254.3	40226.1	82118.3	64857.4	73487.9	10986.5	26352.5	18669.5	49246.2	59088.2	54167.2	39391.3	160353	99872.3
Neurotrimin	Q9P121	505.483	34567.7	17536.6	28592.5	26601.5	27597	18371.3	21623	19997.2	28431.7	30515.7	29473.7	32977.5	32712.1	32844.8	27436.9	29896.8	28666.9	1578.38	1156.72	1367.55	29497.3	21924	25710.7	21767.6	17600.3	19683.9	32335.6	33022.6	32679.1	16252.8	14526.5	15389.6	15496.2	18630.5	17063.4	13194.7	14838	14016.4	16335.1	11952	14143.6	30079	26693.1	28386	29576.9	28591.9	29084.4
Endoplasmic reticulum aminopeptidase 1	Q9NZ08	1667.68	3592.09	2629.89	2248.36	321.188	1284.78	5066.76	1679.06	3372.91	2832.89	4022.74	3427.82	1607.41	1699.8	1653.6	1674.31	846.334	1260.32	1967.05	4233.69	3100.37	1098.63	2213.94	1656.28	4929.78	2216.63	3573.21	1111.32	3343.63	2227.48	3251.65	3819.72	3535.68	2350.74	864.266	1607.5	1580.64	1602.61	1591.63	3686.97	531.557	2109.26	2625.36	941.064	1783.21	1233.59	2832.99	2033.29
Protocadherin Fat 2	Q9NYQ8	8543.51	14793.2	11668.3	8341.82	8600.19	8471.01	13920.2	25303.6	19611.9	334365	327240	330803	11415.9	11606.9	11511.4	9838.84	469640	239740	8704.88	15842.7	12273.8	10510.4	26718	18614.2	5058.95	6648.05	5853.5	10159.3	303309	156734	15533.6	15939.6	15736.6	13011.7	11838.8	12425.2	10619	12441.5	11530.2	12216.4	19141.5	15679	20849	14292.7	17570.8	10749.3	11526.3	11137.8
Inositol monophosphatase 3	Q9NX62	23741.6	720.045	12230.8	16757.7	16182.1	16469.9	19837.9	13819.3	16828.6	3298.78	17373.4	10336.1	26668	15059.3	20863.6	17489.7	12169.8	14829.7	12380.3	9703.32	11041.8	24508.2	16278.6	20393.4	5782.25	17624.2	11703.2	19191.4	1347.91	10269.7	27338.2	114003	70670.6	9811.12	14298.1	12054.6	8666.79	7810.72	8238.75	1815.15	10432.2	6123.67	20118.4	18912.4	19515.4	16611.6	7284.87	11948.2
Leucine-rich repeat-containing protein 4B	Q9NT99	47429.1	54528.5	50978.8	47620.6	51293.8	49457.2	39227.2	72733.9	55980.5	51734.6	102235	76984.9	30478.1	26384.5	28431.3	37385.4	27476.1	32430.7	33094.3	26893.2	29993.7	41739.7	56084.5	48912.1	20139.8	34965.3	27552.5	48708.6	35061.8	41885.2	117931	112518	115225	29034.5	19819.5	24427	26795.5	7135.48	16965.5	22348.6	12649.3	17499	18862.6	45263.9	32063.2	41994.5	42480.5	42237.5
Semaphorin-3G	Q9NS98	785.247	3663.83	2224.54	2437.83	2306.67	2372.25	1434.72	2441.88	1938.3	2024.06	2266.01	2145.04	1848.28	2131.24	1989.76	872.949	1656.04	1264.5	761.608	1121.85	941.727	2381.16	1800.49	2090.82	1205.52	524.605	865.062	3268.85	558.012	1913.43	920.211	2099.19	1509.7	1579.11	2369.85	1974.48	1072.09	646.404	859.245	1283.76	1115.57	1199.66	2075.99	6776.48	4426.23	3562.89	356.026	1959.46
Multimerin-2	Q9H8L6	4317.21	4856.74	4586.98	2572.77	1609.65	2091.21	2008.96	1172.4	1590.68	7030.32	7582.14	7306.23	3478.42	1568.04	2523.23	4560.79	586.809	2573.8	2154.03	5472.56	3813.3	1653.05	858.996	1256.02	2039.15	2149.33	2094.24	723.891	4734.47	2729.18	2324.46	3480.66	2902.56	2219.72	979.418	1599.57	2256.67	2114.38	2185.52	2020.36	2797.31	2408.83	4642.38	2725.81	3684.09	2942.99	4687.3	3815.15
Neuroserpin	Q99574	32150	33599.6	32874.8	9583.05	17647.6	13615.3	20011.8	4224	12117.9	34021.8	49612.7	41817.3	29350.4	27667.5	28508.9	16391.6	24763	20577.3	11762	9816.34	10789.2	26916.6	26073.8	26495.2	27389.8	34813.4	31101.6	30323.7	26256.4	28290.1	14647.7	11382.1	13014.9	16566.7	23375.4	19971.1	5882.61	9056.19	7469.4	11816	21559.6	16687.8	15509.1	12704.2	14106.7	31480.1	24249.7	27864.9
SLIT and NTRK-like protein 1	Q96PX8	6204.07	4981.33	5592.7	2638.65	3673.33	3155.99	424.358	3318.06	1871.21	4683.13	3780.35	4231.74	3407.2	3785.95	3596.57	1135.32	4545.04	2840.18	1942.12	667.088	1304.6	497.045	4802.68	2649.86	1250.35	306.262	778.306	6069.07	6718.21	6393.64	1434.15	1717.27	1575.71	1608.41	982.934	1295.67	771.376	1188.2	979.787	547.184	3216.87	1882.03	1275.02	986.031	1130.53	1320.67	436.023	878.347
Rho guanine nucleotide exchange factor 17	Q96PE2	1683.21	1540.47	1611.84	636.329	292.656	464.492	2414.51	2901.28	2657.9	701.396	2051.05	1376.22	726.211	2387.09	1556.65	1659.86	581.43	1120.65	2619.91	2893.27	2756.59	3303.02	630.591	1966.8	1224.98	1052.1	1138.54	2522.04	1881.28	2201.66	2462.58	1971.59	2217.08	287.263	1853.79	1070.53	2439.52	1477.57	1958.54	2022.06	879.149	1450.6	1511.11	680.95	1096.03	1702.98	973.223	1338.1
N-acetylmuramoyl-L-alanine amidase	Q96PD5	6764.28	5113.47	5938.88	2857.13	3675.68	3266.41	3040.95	2700.69	2870.82	1423.17	4354.39	2888.78	3682.56	4461.32	4071.94	4842.81	2118.66	3480.74	1238.02	1410.9	1324.46	7063.55	1860.89	4462.22	9487.01	1155.39	5321.2	2453.47	5785.4	4119.44	5200.14	1073.57	3136.85	4934.52	1262.97	3098.74	11810.6	543.268	6176.91	2708.8	3293.1	3000.95	2642.37	2196.87	2419.62	2830.21	5137.37	3983.79
Beta-Ala-His dipeptidase	Q96KN2	64246.1	83856.1	74051.1	42970.3	51091.9	47031.1	51256.5	56283	53769.8	63368.8	49118.8	56243.8	53788.9	65292.2	59540.5	47547.5	48691.3	48119.4	40629.5	42881.1	41755.3	75231.5	68542	71886.7	46420.6	35074	40747.3	51654.9	63306.3	57480.6	40977.3	24438	32707.7	64428.6	64745	64586.8	43863.9	32449.8	38156.9	10321.7	46161.3	28241.5	77648.2	71214.8	74431.5	71211.5	83158	77184.7
Brevican core protein	Q96GW7	106232	115545	110888	85692.6	97279.2	91485.9	77105.5	79973.2	78539.3	166901	180404	173652	83999.7	92537.6	88268.7	90424.2	87491.2	88957.7	105601	119273	112437	75178.7	60461.4	67820	43650.6	50273.5	46962	83859.6	86622.4	85241	40081.5	40111.5	40096.5	54451.7	67495.6	60973.6	69940.9	68178.6	69059.7	45517.2	47507.8	46512.5	79298.1	82493.5	80895.8	115275	110327	112801
Leucine-rich repeat and immunoglobulin-like domain-containing nogo receptor-interacting protein 1	Q96FE5	1316.32	8689.6	5002.96	10740.6	1399.33	6069.94	5976.59	1578.07	3777.33	2507.01	19698.2	11102.6	2828.38	2091.39	2459.89	1308.46	5860.52	3584.49	5386.64	9740.14	7563.39	6352.49	5976.82	6164.66	1942.24	2827.95	2385.09	10804.3	7440.15	9122.21	1124.33	1800.91	1462.62	4894.39	5095.63	4995.01	5168.01	4082.58	4625.3	1434.46	1379.74	1407.1	5001.78	5942.23	5472	2707.64	2352.11	2529.88
Polyubiquitin-C	Q96C32	3030.55	7755.48	5393.02	2330.52	1844.53	2087.53	3701.61	2477.59	3089.6	5932.11	7563.87	6747.99	4914.8	10457.9	7686.37	881.293	1714.67	1297.98	1354.6	937.078	1145.84	7926.5	8994.47	8460.49	782.137	1652.66	1217.4	1047.14	3044.12	2045.63	713.643	3198.14	1955.89	5571.48	2617.78	4094.63	1438.57	2828.95	2133.76	656.392	1515.83	1086.11	4569.44	1174.48	2871.96	5007.61	2825.17	3916.39
Kallikrein-6	Q92876	266355	301524	283939	261534	270749	266142	210160	197768	203964	378192	363877	371034	250202	276108	263155	264495	250739	257617	270165	284176	277170	402046	364582	383314	280360	256403	268381	292574	289908	291241	162908	118692	140800	183721	188691	186206	156174	140223	148199	173682	153626	163654	278741	302655	290698	343134	343489	343312
Neogenin	Q92859	62438.3	65802.7	64120.5	58799.9	50169.3	54484.6	28065.2	55097	41581.1	96329.8	36594.1	66462	65982	62346.8	64164.4	54374.7	51513.3	52944	69594	58727.3	64160.7	52372	62903.2	57637.6	30968.3	43303.6	37135.9	60058.4	61741	60899.7	60642.8	41182.5	50912.7	29398.3	42561.1	35979.7	41730.1	45050.7	43390.4	30609.2	36029.6	33319.4	67182.5	68135.9	67659.2	63076.4	65166.5	64121.4
Serine protease HTRA1	Q92743	852.073	9890.91	5371.49	421.674	985.488	703.581	375.63	5492.22	2933.93	10999	9123.34	10061.2	1475.38	10894.8	6185.11	873.666	15489.9	8181.8	7364.48	8375.53	7870.01	427.872	900.862	664.367	13797.7	14163.2	13980.5	14408.7	563.648	7486.17	666.06	1778.35	1222.2	12701.1	960.861	6831	489.959	328.676	409.317	760.535	657.439	708.987	10853.7	1137.02	5995.38	20954.4	495.156	10724.8
Protein FAM3C	Q92520	35195.1	38395.9	36795.5	21949	26694.7	24321.8	1162.71	23594.4	12378.5	34751.3	31808.9	33280.1	37478.6	35606.8	36542.7	26820.2	25671.6	26245.9	27380.3	28618.4	27999.3	34247.7	36418.6	35333.1	20198	20151.8	20174.9	27815.8	34580.8	31198.3	16371.3	12939.2	14655.3	17533.6	17161	17347.3	2343.22	10727.4	6535.33	20597.3	19270.4	19933.9	29099.9	33814.8	31457.3	3243.48	34256.6	18750
Secretogranin-3	Q8WXD2	59163	63677.2	61420.1	49995.9	17353.6	33674.7	31862.5	44427.2	38144.8	63097.1	72006.2	67551.6	66713.8	60750.8	63732.3	52592.3	55711.9	54152.1	14866.4	38697.1	26781.7	35577.9	26554.6	31066.3	36383.1	37354.7	36868.9	60186.9	66892.1	63539.5	19980.6	22170	21075.3	34434.7	28309	31371.8	19752.8	24041	21896.9	8791.65	21076.4	14934	48318	53363.1	50840.6	52595.1	53988.6	53291.8
Protein FAM98A	Q8NCA5	17440.7	1972.37	9706.52	17454.4	1369.28	9411.85	3772.92	24370.4	14071.6	9460.63	2431.55	5946.09	1883.25	1166.16	1524.71	3860.53	23731.5	13796	2031.71	3108.76	2570.24	2415.48	9906.27	6160.88	11555.9	1740.43	6648.14	14306.5	14476.1	14391.3	2581.13	1031.28	1806.2	22012.4	1033.08	11522.8	1681.2	27433.2	14557.2	18300.8	19652	18976.4	14780.6	16244	15512.3	3325.21	1747.49	2536.35
SLIT and NTRK-like protein 4	Q8IW52	5459.3	5167.04	5313.17	3238.43	3760.07	3499.25	3962.55	3873.88	3918.21	6990.05	5221.71	6105.88	3747.85	3791.99	3769.92	3879.64	1336.8	2608.22	4443.94	4577.31	4510.62	5160.26	3008.71	4084.49	2110.95	2891.48	2501.22	5309.34	5544.68	5427.01	723.133	1197.79	960.46	1959.32	2260.68	2110	2509.96	2574.03	2541.99	2140.73	2123.18	2131.96	3762.6	3828.13	3795.36	3872.11	4860.73	4366.42
Adipocyte enhancer-binding protein 1	Q8IUX7	12455.5	13013.5	12734.5	11725.8	10189.2	10957.5	12239.5	15347.8	13793.7	12801.9	16090.4	14446.2	13313.9	11993.9	12653.9	10626.3	4502.29	7564.28	17991.7	8027.91	13009.8	7256.4	6672.31	6964.36	4048.71	7352.16	5700.44	8954.17	6468.05	7711.11	4110.88	4410.31	4260.59	5098.06	6637.91	5867.98	7378.65	7143.53	7261.09	11913.8	16441.2	14177.5	4112.98	4070.56	4091.77	12340.7	12105.4	12223
B4GALT1 protein	Q86XA6	13556	13223	13389.5	9098.65	9384.47	9241.56	8144.01	7687.39	7915.7	6052.32	9417.69	7735.01	11333.4	8659.3	9996.35	8045.72	626.477	4336.1	8295.24	7535.83	7915.53	6681.25	7346.58	7013.91	6195.32	5843.63	6019.48	7408.23	10138.4	8773.29	5055.1	3889.9	4472.5	6995.5	7630.93	7313.22	5409.45	6721.28	6065.37	6665.8	7536.12	7100.96	6514.02	8296.93	7405.47	5207.69	6767.15	5987.42
Multiple epidermal growth factor-like domains protein 8	Q7Z7M0	110008	128059	119033	60652.9	91300.5	75976.7	82838.4	73934.6	78386.5	136700	132724	134712	72078.3	78713.9	75396.1	81012.7	75951.1	78481.9	98351	78944.8	88647.9	92834.1	76155	84494.5	41747.5	51369.3	46558.4	58798.2	40876.2	49837.2	39502.7	38134.2	38818.5	42008.9	64597.8	53303.4	42420.3	45177.4	43798.9	47557.7	43054.2	45306	66496.2	62369.7	64433	76747.1	89890.9	83319
Keratin, type II cytoskeletal 1b	Q7Z794	5517.49	2139.66	3828.58	2861.4	2238.11	2549.76	1831.9	1747.07	1789.48	2392	1006.98	1699.49	483.276	2670.5	1576.89	1292.71	945.981	1119.35	2182.47	717.327	1449.9	4354.17	2969.34	3661.76	974.154	900.909	937.532	1105.53	1050.24	1077.89	781.373	674.878	728.126	1001.63	3785.71	2393.67	2053.61	1565.03	1809.32	733.317	2087.23	1410.27	6208.81	3469.14	4838.97	998.011	540.938	769.474
Neuronal growth regulator 1	Q7Z3B1	18665.4	20614.7	19640	12941.7	17344.3	15143	15627.2	14380.7	15004	23900.1	27252.6	25576.3	1662.4	23136.7	12399.6	15041.2	18532.4	16786.8	21123.3	21515.5	21319.4	17061.5	16761	16911.3	12020.9	12000.6	12010.7	19580.7	19838.4	19709.6	8955.07	6030.03	7492.55	10495.7	12345.9	11420.8	7195.03	7719.99	7457.51	11434.3	9341.57	10387.9	15306.3	1487.49	8396.89	19749.5	19125.1	19437.3
Plexin domain-containing protein 2	Q6UX71	23697.3	23168.6	23433	18294.7	21866.3	20080.5	18686.5	20010.5	19348.5	28222.6	26315.6	27269.1	14439	16100.2	15269.6	10306.6	10543.6	10425.1	15898.4	19261.7	17580.1	19298.7	17853.6	18576.1	13723.3	12175.7	12949.5	20375.7	18698.3	19537	8004.24	907.978	4456.11	12251.6	10726.5	11489	9445.93	9234.01	9339.97	12793.4	13412.8	13103.1	17623.8	22603.8	20113.8	19094.3	17723.7	18409
Follistatin-related protein 4	Q6MZW2	14132.7	2419.45	8276.06	6173.63	5890.85	6032.24	5038.07	4450.41	4744.24	15375	13059.3	14217.2	11250.9	3124.39	7187.63	7955.45	8956.9	8456.18	8699.75	10707.2	9703.45	12276.4	8103.73	10190.1	2356.41	13249.6	7803.01	13813.3	7954.7	10884	6586.64	4860.28	5723.46	5110.69	7186.28	6148.49	3103.79	2826.19	2964.99	2918.04	3508.03	3213.03	5303.86	2678.59	3991.22	6712.22	10713.3	8712.78
Retinol binding protein 4, plasma, isoform CRA_b	Q5VY30	58748.4	58229.8	58489.1	48066.4	73363.5	60714.9	65279.9	106727	86003.3	151757	75099.1	113428	72335.1	229458	150896	49756.6	53895.1	51825.9	35410.1	36383.3	35896.7	85783.6	88083.8	86933.7	99376.8	112483	105930	64914.2	48742.2	56828.2	101446	63494.9	82470.2	41779.1	30581.7	36180.4	81974.7	58721.3	70348	68031.1	42625.1	55328.1	16578.4	30153.3	23365.9	72350.9	69077.4	70714.1
Beta-hexosaminidase subunit beta	Q5URX0	1438.45	2354.84	1896.64	5906.81	4252.72	5079.76	4234.14	1159.92	2697.03	4091.83	6316.23	5204.03	1530.23	1020.68	1275.45	882.544	1989.59	1436.07	1133.68	3831.32	2482.5	1400.6	974.227	1187.41	2918.71	1132.14	2025.42	4457.48	982.611	2720.05	1096.73	1242.29	1169.51	695.697	4086.68	2391.19	1041.8	1500.25	1271.02	736.321	4907.21	2821.76	851.065	4608.96	2730.01	5619.59	1037.56	3328.57
Inter-alpha-trypsin inhibitor heavy chain H2	Q5T985	102924	114728	108826	72667.1	90529.6	81598.3	73060	100826	86943	94395.5	60329.3	77362.4	182058	157598	169828	136881	109639	123260	120854	117398	119126	230850	207534	219192	109451	99977.4	104714	124896	103702	114299	248981	233805	241393	131497	87794.2	109645	240265	242210	241237	64952.2	79453	72202.6	195325	132513	163919	109244	106645	107945
Cathepsin L1	Q5T8F0	9282.26	2513.39	5897.83	3111.09	8379.15	5745.12	10051.4	3338.14	6694.77	8791.23	11284.7	10037.9	4234.89	8307.25	6271.07	7496.72	1374.28	4435.5	2670.52	10102.2	6386.36	1945.89	6779.59	4362.74	5728.51	2292.97	4010.74	9515.64	9608.83	9562.23	1111.41	7802.64	4457.02	5618.88	7099.33	6359.11	6163.58	1078.33	3620.96	6573.63	3066.18	4819.9	5385.9	8034.93	6710.42	695.993	10718.2	5707.09
ATP-binding cassette sub-family F member 1 (Fragment)	Q5STZ8	1583.77	4140.12	2861.94	13426.9	14948.8	14187.8	1904.64	25080.4	13492.5	21425.7	18494.9	19960.3	10048.6	8153.12	9100.87	10968.3	10060.7	10514.5	24698.1	3946.86	14322.5	67528.2	68043.2	67785.7	5564.18	351.73	2957.96	3188.98	2046	2617.49	2032.17	88448.7	45240.4	1863.14	20336.4	11099.8	2773.87	3010.59	2892.23	3023.7	19714.1	11368.9	13637.9	2733.07	8185.49	6703.68	483.191	3593.44
Metalloproteinase inhibitor 1	Q5H9A7	51308.7	51861.8	51585.2	52695.4	46747.8	49721.6	16654.9	33128.6	24891.8	50136.7	49627.2	49881.9	26939.1	44244.7	35591.9	44712	29452	37082	40036.4	15531.4	27783.9	78372.4	67395.6	72884	43199.6	28607.5	35903.5	39902.7	31708.3	35805.5	43439.9	46725.7	45082.8	35879.6	36939.5	36409.6	33211.5	8194.26	20702.9	80124.5	33822.8	56973.6	40581.8	48891.8	44736.8	46212.9	26993.5	36603.2
3-hydroxyacyl-CoA dehydrogenase type-2	Q5H928	2655.48	2257.8	2456.64	2674.18	1718.37	2196.28	2121.86	999.965	1560.91	2609.84	4855.76	3732.8	4423.9	2153.55	3288.73	1480.8	8779.62	5130.21	3223.87	5316.4	4270.14	1612.31	2191.38	1901.85	2406.58	1620.51	2013.54	2251.42	2475.99	2363.7	3270.75	797.841	2034.3	4186.66	3727.55	3957.1	4149.56	5091.23	4620.4	1763.35	2604.72	2184.03	2645.8	2561.8	2603.8	1085.84	1770.05	1427.94
IL6ST nirs variant 3	Q5FC05	1421.91	1555.18	1488.55	8460.54	4310.92	6385.73	21070.3	3689.23	12379.8	13346.7	7895.66	10621.2	3131.04	5597.51	4364.27	6909.86	16867.5	11888.7	1636.53	1990.71	1813.62	5275.01	6112.17	5693.59	4121.45	2056.62	3089.03	859.922	8421.39	4640.65	30745.2	10954.1	20849.6	2571.88	1256.14	1914.01	2514.95	1887.72	2201.34	5257.96	1476.13	3367.04	3634.64	808.003	2221.32	7843.79	7337.35	7590.57
PSAP protein	Q5BJH1	15083.2	16324.3	15703.7	20696.7	11197	15946.8	23756.6	15824.8	19790.7	24842.7	13223.6	19033.2	4689.22	19512.1	12100.6	11702.6	6025.14	8863.85	14601.2	16685.8	15643.5	22312.1	22309.1	22310.6	10657.8	11200.3	10929	13209	20009	16609	20655	12285.6	16470.3	11343.8	14309.9	12826.9	17716.4	16093.6	16905	11453.5	13419.2	12436.4	8477.32	7982.7	8230.01	26465.2	31847.7	29156.5
Transmembrane protein 132A	Q24JP5	14198	19264.2	16731.1	12821.3	14748.3	13784.8	3797.71	8991.12	6394.41	9995.33	14234.8	12115.1	7112.43	12845.7	9979.08	16305.2	11657.2	13981.2	10406.6	9583.41	9995.01	6741.09	14820.8	10780.9	11609.6	11845.3	11727.4	13682.4	9410.56	11546.5	12170.7	9701.44	10936.1	9241.23	5060.96	7151.09	15479.4	4873.98	10176.7	7000.41	9931.3	8465.85	5978	12523.1	9250.53	15727.2	13692.2	14709.7
Glutaminyl-peptide cyclotransferase	Q16769	17472.9	14121.2	15797	11967.2	13381.8	12674.5	15916.4	13702.4	14809.4	18532.3	22604.6	20568.5	7282.03	8394.23	7838.13	19405.1	12277.7	15841.4	13778.8	2420.7	8099.74	11777.8	12484.7	12131.3	7474.5	5914.33	6694.42	15592.6	14535.1	15063.9	7892.09	7101.05	7496.57	2226.49	6360.59	4293.54	7484.36	1194.66	4339.51	6160.04	7468.1	6814.07	12666.6	10085.2	11375.9	11686	8775.52	10230.7
Extracellular matrix protein 1	Q16610	129710	120554	125132	71115	72308.2	71711.6	90899.3	97880.8	94390.1	125837	131864	128850	116477	135196	125837	97795.9	86590.2	92193	95472.9	105185	100329	115388	85362.1	100375	60140.5	70766.8	65453.6	112147	112771	112459	79534.1	61859.5	70696.8	70162.6	69326.4	69744.5	73509.8	61298.6	67404.2	72304.5	63195.4	67750	118067	128618	123342	90380.6	84371.9	87376.3
Insulin-like growth factor-binding protein 7	Q16270	42022.8	39430.3	40726.6	57675.8	66263.1	61969.5	40590.1	50405.3	45497.7	66234.8	70282.3	68258.5	59314.9	54842.7	57078.8	38022	28994.7	33508.4	61423	57931.6	59677.3	53064.2	55186.2	54125.2	42084.3	52736.1	47410.2	53377.1	47711.5	50544.3	56914.4	53619.9	55267.2	50938.1	53585.6	52261.8	37237	40705.8	38971.4	66881.8	61612.2	64247	32246.4	37090.6	34668.5	77351	91658.8	84504.9
Adiponectin	Q15848	2989.01	2439.76	2714.39	1428.47	2061.12	1744.79	2095.99	2441.34	2268.66	3270.4	1249.26	2259.83	5218.26	3513.46	4365.86	2451.14	1377.04	1914.09	2787.77	3384.23	3086	1726.63	1981.01	1853.82	2959.31	1987.37	2473.34	1037.65	1193.03	1115.34	1245.36	2181.86	1713.61	1657.7	777.927	1217.81	2353.43	1659.15	2006.29	3644.64	2580.88	3112.76	874.293	2618.31	1746.3	3191.64	1540.46	2366.05
Neuronal pentraxin-1	Q15818	115590	114226	114908	111753	101094	106423	98687.9	104464	101576	134039	128655	131347	95054.3	69088.5	82071.4	98159.4	106428	102294	125776	111549	118663	86106.3	84303.7	85205	76446.2	65559.3	71002.8	101248	100199	100723	59470.5	65380.4	62425.5	89722	85947.3	87834.6	67681.6	60585.9	64133.7	64405.8	61389.9	62897.9	88202.4	91125.3	89663.9	123220	123298	123259
Transforming growth factor-beta-induced protein ig-h3	Q15582	148076	179419	163747	166805	132886	149846	150059	160446	155253	209890	204640	207265	59054.3	167353	113204	201212	89080	145146	147226	140756	143991	218615	194568	206592	156255	135550	145903	53673.1	67721.3	60697.2	73607.6	51962.8	62785.2	142854	142059	142456	75049.4	169077	122063	164961	179935	172448	143572	139128	141350	80647.4	160253	120450
Procollagen C-endopeptidase enhancer 1	Q15113	93240.9	90507.4	91874.1	87257.4	91573.4	89415.4	75738.2	71090.6	73414.4	144266	139434	141850	88083.8	81960.7	85022.2	108886	92084.5	100485	91939.6	92379	92159.3	129242	124760	127001	105456	106288	105872	96355.9	96559.5	96457.7	112377	106714	109546	59117.2	60848.9	59983	62444.5	68673.7	65559.1	104250	103966	104108	106216	103167	104691	107016	96437.8	101727
Protein RRP5 homolog	Q14690	3059.54	2860.65	2960.09	7302.86	17518.8	12410.8	3522.8	4504.05	4013.42	3405.51	2632.9	3019.21	2072.85	1916.92	1994.89	2149.92	3568.97	2859.44	3393.83	3510.37	3452.1	1977.17	1453.45	1715.31	1350.54	1158.05	1254.29	4258.69	1668.57	2963.63	3825.21	914.977	2370.1	655.551	4712.93	2684.24	5285.2	359.307	2822.25	3202.46	2678.41	2940.43	6355.49	4246.13	5300.81	1877.04	4117.93	2997.49
Inter-alpha-trypsin inhibitor heavy chain H4	Q14624	175216	184802	180009	192431	189146	190789	198108	210545	204326	178037	173609	175823	283946	284516	284231	230673	217000	223837	199712	189846	194779	298767	256381	277574	154781	175163	164972	243490	246868	245179	438847	431098	434973	193418	200510	196964	431446	411482	421464	225746	224245	224995	230605	208737	219671	181326	192360	186843
Hyaluronan-binding protein 2	Q14520	2355.83	6008.19	4182.01	4350.63	1661.11	3005.87	4610.79	1710.85	3160.82	4781.88	6992.98	5887.43	9868.76	2464.75	6166.76	6973.82	2608.03	4790.92	5572.27	1816.85	3694.56	7079.3	8309.47	7694.39	988.572	2472.32	1730.45	7483.32	6683.27	7083.29	18414	2733.97	10574	3128.69	2748.73	2938.71	5260.2	6338.44	5799.32	4061.57	4655.36	4358.47	1099.78	3841.57	2470.67	1735.11	13269.2	7502.14
SPARC-like protein 1	Q14515	204257	198293	201275	179085	205594	192339	186270	175644	180957	251280	250228	250754	198956	198903	198930	153905	161332	157618	176540	202650	189595	190244	159028	174636	151778	145498	148638	170330	175360	172845	109117	103290	106204	110693	111171	110932	118182	110155	114169	123858	122709	123284	143388	163207	153298	224465	223711	224088
Contactin-1	Q12860	351931	331552	341742	336299	339153	337726	220206	221966	221086	479925	498601	489263	312559	322579	317569	274050	289377	281713	358758	364895	361826	273935	258924	266430	244380	239276	241828	249855	267928	258892	128633	123810	126221	157230	138096	147663	174630	194342	184486	188730	202927	195828	327818	339455	333637	288495	299028	293761
Galectin-3-binding protein	Q08380	219055	195673	207364	204756	208058	206407	210838	190659	200748	235637	268553	252095	212450	190617	201534	234286	228850	231568	278465	263362	270913	206064	242262	224163	189473	193694	191584	228454	222072	225263	144998	186755	165876	171715	111775	141745	152318	164786	158552	221393	172533	196963	125281	218463	171872	221706	202894	212300
Prolow-density lipoprotein receptor-related protein 1	Q07954	2570.45	1183.33	1876.89	3361.58	3706.22	3533.9	2314.11	2406.9	2360.5	1806.71	2451.76	2129.24	1250.35	4337.3	2793.83	1317.04	2228.83	1772.93	2317.5	2690.88	2504.19	3158.64	2103.87	2631.26	5451.47	2801.08	4126.27	2867.46	3309.08	3088.27	969.35	5328.33	3148.84	3171.93	3559.83	3365.88	2106.8	994.926	1550.86	876.208	2610.85	1743.53	2055.12	2106.26	2080.69	2158.1	4143.97	3151.03
Fibromodulin	Q06828	3130.1	5573.2	4351.65	2265.57	2872.06	2568.82	1746.8	2100.2	1923.5	3199.96	2283.51	2741.73	3301.02	1352.09	2326.56	459.791	2235.01	1347.4	4477.48	9480.73	6979.11	991.758	12702.5	6847.11	10238.3	3751.36	6994.81	11772.3	1705.25	6738.76	3326.67	1915.89	2621.28	2541.76	263.154	1402.46	711.869	1398.6	1055.24	2628.63	6395.49	4512.06	2160.63	1641.73	1901.18	1150.93	2315.62	1733.28
Nucleobindin-1	Q02818	6890.91	1917	4403.95	13660.5	3604.08	8632.31	1185.76	1815.58	1500.67	2044.79	11312.1	6678.46	3975.71	26844.8	15410.2	22903	1456.53	12179.7	1280.01	17497.3	9388.68	1012.14	2791.79	1901.96	6975.44	7030.72	7003.08	14664.3	912.743	7788.54	13849.6	14150.8	14000.2	731.071	3490.87	2110.97	25192.3	27653	26422.6	12473.7	2298.44	7386.07	1857.37	24537.1	13197.2	2803.07	2304.82	2553.94
Contactin-2	Q02246	81846.2	101649	91747.4	69645.6	65567.1	67606.3	52009.9	55925.2	53967.5	134494	106875	120685	67346.2	56764.4	62055.3	46615.7	66354.3	56485	21578.1	62756.1	42167.1	63469.3	58837.3	61153.3	56616.2	58259.5	57437.9	68067.9	75984.1	72026	19103.9	50929.9	35016.9	22542.3	39778.8	31160.6	41262.1	39123	40192.6	35361.3	59493.7	47427.5	72586.1	80138.8	76362.4	71096.9	29773.9	50435.4
Basement membrane-specific heparan sulfate proteoglycan core protein	P98160	30746.4	27168.9	28957.7	32016.7	32497.4	32257	21442.2	13578.5	17510.3	13412.1	33960.5	23686.3	31319.7	29394.6	30357.2	35321.7	33348.6	34335.2	14591.8	25774.5	20183.1	34250.9	34422.3	34336.6	24112.4	15099.1	19605.8	23686.9	17467.1	20577	12704.6	20664.7	16684.7	8957.39	9546.64	9252.01	18708.9	16622.5	17665.7	23276.5	16659.7	19968.1	26200.6	24517.1	25358.9	33565.4	14375	23970.2
Fibulin-2	P98095	3010.17	3485.25	3247.71	1264.19	492.623	878.404	756.576	1722.08	1239.33	499.4	420.384	459.892	1535.74	1083.03	1309.39	1469.12	1557.79	1513.45	840.011	3351.13	2095.57	1582.73	978.885	1280.81	1126.44	612.979	869.712	2562.98	2295.13	2429.06	1840.78	456.353	1148.57	393.634	1857.33	1125.48	1755.28	971.026	1363.15	1733.18	1338.79	1535.99	551.134	1796.2	1173.66	2111.42	884.854	1498.14
Immunoglobulin lambda variable 3-21	P80748	7755.6	9735.06	8745.33	21148.1	23394.2	22271.1	10689.9	11672.4	11181.2	20033	23121.1	21577	19881.9	15810	17845.9	20155.4	16844.5	18500	29651.7	28979.7	29315.7	33433.2	31065.5	32249.3	21225.4	24369.3	22797.3	7698.74	7955.84	7827.29	25120.6	30740.6	27930.6	25574.2	27299.8	26437	29026.7	30348.7	29687.7	49672.2	43408.4	46540.3	20971.7	22530.7	21751.2	11189.6	10028	10608.8
Isoform 4 of Tyrosine-protein phosphatase non-receptor type substrate 1	P78324-4	40411.5	41672.8	41042.2	2193.19	36287.3	19240.3	23746.5	5228.34	14487.4	51780.8	49567.6	50674.2	49625.5	20187.4	34906.4	39446	44518.6	41982.3	81516	91154.2	86335.1	45191.6	37279.1	41235.3	22538.2	21600.2	22069.2	33502.6	31502.3	32502.5	7871.33	22721.2	15296.3	24535.7	22055.7	23295.7	5567.26	23271.6	14419.4	22188.6	19965.1	21076.8	34324.6	30974.6	32649.6	35423.7	18372.8	26898.3
Hemoglobin subunit alpha	P69905	23160	16569.9	19865	2.6521e+06	2.67167e+06	2.66188e+06	15407.1	20951.4	18179.2	1.433e+06	1.53487e+06	1.48394e+06	7015.63	27434.7	17225.1	5627.35	8499.46	7063.41	11945.7	7570.72	9758.21	13693.9	10082.2	11888	11307.2	16081.7	13694.5	32794.6	44826.6	38810.6	58804.1	58983.7	58893.9	20256.1	14921.7	17588.9	11335	9877.87	10606.5	52826.5	63379.6	58103.1	17741.7	16727.9	17234.8	242538	247263	244900
Hemoglobin subunit beta	P68871	24656.3	17983.3	21319.8	4.1606e+06	4.25347e+06	4.20704e+06	10841.2	11766.3	11303.8	2.53747e+06	2.49934e+06	2.5184e+06	5546.62	5136.63	5341.62	4244.63	9617.82	6931.23	7233.73	8482.22	7857.97	11286.9	16136.3	13711.6	9613.33	65489	37551.2	28978.3	41787.5	35382.9	87832.6	74587.7	81210.2	9806.32	20550.6	15178.5	54781.5	5505.62	30143.6	88536.3	79873	84204.7	11007.6	8260.03	9633.8	341347	372836	357091
Actin, cytoplasmic 2	P63261	46486.6	45072.6	45779.6	50206.1	33259.3	41732.7	34730.4	31670.1	33200.2	54772	57077.8	55924.9	85800.4	101394	93597	23864.3	32861	28362.7	36015.1	24104.2	30059.7	67421.5	62948.6	65185	35655.8	36018.8	35837.3	37561.8	42386	39973.9	32690.3	31148.7	31919.5	17118.2	18060.3	17589.2	28889	27405.2	28147.1	42836.6	51893.3	47364.9	40805.3	30630.3	35717.8	52926.1	48577	50751.6
Beta-2-microglobulin	P61769	3288.76	3466.58	3377.67	3563.65	1540.31	2551.98	1741.91	4519.94	3130.93	19034.1	9061.86	14048	6847.11	4145.89	5496.5	3567.03	1585.4	2576.22	2449.94	1319.86	1884.9	956.257	31282.7	16119.5	18698.7	2629.02	10663.9	3118.61	3024.2	3071.41	13254.5	770.756	7012.61	4381.18	2386.08	3383.63	2677.22	932.241	1804.73	2337.52	1217.75	1777.64	7355.77	3226.21	5290.99	12717.4	11663.6	12190.5
Triosephosphate isomerase	P60174	9782.47	7421.62	8602.05	9089.97	7353.39	8221.68	4080.32	5379.62	4729.97	9453.63	14918.6	12186.1	9773.29	10398.7	10086	7075.89	7024.38	7050.13	11523.6	9941.8	10732.7	2057.98	2314.7	2186.34	5494	6284.62	5889.31	1929.17	2380.85	2155.01	5012.05	2566.07	3789.06	3730.62	3082.32	3406.47	3332.92	3839.61	3586.26	4216.52	4740.97	4478.74	7666.44	3666.56	5666.5	7749.98	9892.16	8821.07
Cadherin-13	P55290	20895.4	26715.2	23805.3	3242.57	21278.3	12260.4	10248	14165	12206.5	27588.9	23727.3	25658.1	29236.6	21048	25142.3	20105.6	4439.02	12272.3	18738.1	3951.16	11344.6	24944.8	22578.2	23761.5	10821.5	1855.18	6338.33	25862.8	24908.1	25385.5	12447.2	13408.3	12927.8	7486.64	8064.95	7775.79	5015.86	6745.03	5880.44	7614.56	9599.12	8606.84	5117.22	15366.4	10241.8	12831.1	5504.06	9167.58
Phospholipid transfer protein	P55058	310176	303308	306742	336095	344849	340472	315526	318464	316995	260640	264658	262649	209919	215056	212487	231092	110247	170669	250871	269989	260430	360473	337680	349077	302100	291955	297028	286479	277472	281976	226150	208726	217438	254959	267760	261360	229439	109062	169251	249099	233377	241238	258058	264864	261461	289531	305199	297365
Voltage-dependent calcium channel subunit alpha-2/delta-1	P54289	43980.6	51449.4	47715	32416.1	37377.2	34896.7	31447.1	15882.6	23664.8	51976.9	55346.9	53661.9	39319.1	84267.2	61793.1	50277.6	50751.2	50514.4	95909.1	92611.6	94260.4	36512.1	56238.1	46375.1	15923.8	25440.5	20682.1	49812.2	20020.6	34916.4	34643.5	26027.9	30335.7	28048.6	28605.5	28327.1	36771	16108.1	26439.6	20266.3	11388.7	15827.5	40512.6	53785.5	47149	60503.9	38760.7	49632.3
Lumican	P51884	31128.7	25660.8	28394.8	50115.6	28364.8	39240.2	25954.8	31081.5	28518.2	35889.9	23694.4	29792.2	23854.1	31791.5	27822.8	19674.3	30372.3	25023.3	22927.4	20739.2	21833.3	41362.3	23330.5	32346.4	21100	20580.7	20840.3	31879.7	25776.9	28828.3	39950.5	45806.1	42878.3	27903.6	26500.4	27202	39049.1	31046.5	35047.8	28868.1	27375.1	28121.6	23418.1	41022.3	32220.2	22054.5	42029.7	32042.1
Isoform 2 of Amyloid-like protein 1	P51693-2	383549	414646	399098	234285	250404	242344	320592	315752	318172	434827	476172	455499	355847	336468	346158	294563	299654	297109	301299	330906	316103	371332	338895	355114	151829	200371	176100	362887	338633	350760	175868	148634	162251	168867	190776	179822	155334	132116	143725	126475	152062	139268	330494	335809	333152	306163	307189	306676
GMP synthase [glutamine-hydrolyzing]	P49915	55173.4	50536	52854.7	40707.3	47222.4	43964.8	43733.1	56105.9	49919.5	59904	50197.1	55050.5	54965.4	53937.3	54451.3	55167	72115.2	63641.1	59701.8	56571.2	58136.5	0	0	0	71642.1	75622.6	73632.4	77018.2	70582.1	73800.2	75636.2	93967.8	84802	62289.5	57145.6	59717.6	39776.4	634231	337004	40595.1	59191.6	49893.3	47677	44682.3	46179.6	79977.4	61753.7	70865.5
Alpha-mannosidase 2x	P49641	19534.9	19600.3	19567.6	6865.64	18404.7	12635.2	9070.54	8561.43	8815.99	10837.2	19628.9	15233	16139.7	18389.9	17264.8	18238.8	7283.73	12761.2	17191.2	8583.13	12887.2	18002.1	19153.6	18577.9	14879.3	1698.81	8289.05	20029.5	17227.9	18628.7	4606.96	15921.3	10264.1	12916.7	10112.2	11514.5	7293.79	4205.98	5749.88	8546.42	5491.38	7018.9	22359.4	22156.4	22257.9	18681	17085.8	17883.4
Afamin	P43652	116844	117295	117069	100995	112385	106690	145965	144231	145098	173310	171194	172252	208560	212680	210620	176743	173746	175245	94455.8	105300	99877.9	195527	179971	187749	119055	128557	123806	164053	164178	164115	237532	266991	252261	259423	274341	266882	191602	214151	202877	158755	174407	166581	117185	100825	109005	119475	133352	126414
Biotinidase	P43251	85669	94686.8	90177.9	55402	49846.4	52624.2	45866	61675.9	53770.9	99872.5	104656	102264	54362	65395.4	59878.7	56641.4	51548.3	54094.8	62081.1	74018.6	68049.8	81044.2	73230.5	77137.3	60844.7	63457.6	62151.2	75083.3	79627.6	77355.4	49267.1	46744	48005.5	58077.9	57204.7	57641.3	56687.8	47073.9	51880.8	51215.9	50779.5	50997.7	51236.4	75372.6	63304.5	47631.8	50331.6	48981.7
Cell surface glycoprotein MUC18	P43121	790.634	8666.49	4728.56	6426.24	3658.11	5042.18	6490.62	6846.76	6668.69	7365.04	3521.01	5443.02	7375.26	2345.26	4860.26	9247.3	1682.4	5464.85	6132.24	6086.73	6109.48	1400.7	4774.18	3087.44	7251.18	2647.66	4949.42	4513.21	6131.69	5322.45	3141.65	3433.16	3287.4	5424.99	5015.77	5220.38	2008.56	2223.07	2115.82	3028.37	4321.53	3674.95	3213.28	9260.29	6236.79	9257.97	1619.66	5438.82
Prostaglandin-H2 D-isomerase	P41222	3.54852e+06	3.53198e+06	3.54025e+06	2.64708e+06	2.51592e+06	2.5815e+06	2.18472e+06	2.22589e+06	2.20531e+06	3.16151e+06	3.19709e+06	3.1793e+06	2.75681e+06	2.83449e+06	2.79565e+06	2.68595e+06	2.5938e+06	2.63987e+06	2.81172e+06	3.02712e+06	2.91942e+06	2.78733e+06	2.4875e+06	2.63742e+06	1.97727e+06	2.07322e+06	2.02524e+06	2.76967e+06	2.86488e+06	2.81728e+06	1.48091e+06	1.39368e+06	1.43729e+06	1.66247e+06	1.6979e+06	1.68018e+06	1.4941e+06	1.38299e+06	1.43855e+06	1.67985e+06	1.47899e+06	1.57942e+06	3.12095e+06	3.13132e+06	3.12614e+06	2.46932e+06	2.55722e+06	2.51327e+06
Pigment epithelium-derived factor	P36955	1.38379e+06	1.36359e+06	1.37369e+06	1.31899e+06	1.3746e+06	1.3468e+06	1.29114e+06	1.33582e+06	1.31348e+06	1.64629e+06	1.74651e+06	1.6964e+06	1.42177e+06	1.41325e+06	1.41751e+06	1.10635e+06	1.10294e+06	1.10464e+06	1.24413e+06	1.2405e+06	1.24231e+06	1.38512e+06	1.23449e+06	1.30981e+06	1.19994e+06	1.22485e+06	1.2124e+06	1.36906e+06	1.36056e+06	1.36481e+06	976522	909731	943127	1.0109e+06	1.00352e+06	1.00721e+06	841005	846661	843833	1.15059e+06	1.09719e+06	1.12389e+06	1.18018e+06	1.20103e+06	1.19061e+06	1.46983e+06	1.51987e+06	1.49485e+06
Chitinase-3-like protein 1	P36222	346314	347840	347077	206268	204772	205520	165694	150621	158157	208571	216865	212718	115306	121830	118568	110648	123958	117303	104202	105439	104820	254709	232043	243376	184023	173839	178931	240532	238066	239299	149978	102176	126077	92508.2	103348	97928	82684.8	68040.7	75362.7	120744	119420	120082	187707	178137	182922	151923	168856	160390
Insulin-like growth factor-binding protein complex acid labile subunit	P35858	13674.1	6146.76	9910.43	3921.3	5191.26	4556.28	10088.1	15523.1	12805.6	6898	7130.76	7014.38	11074.2	19543.2	15308.7	12273.5	15133.4	13703.4	15697.6	7043.44	11370.5	15339.4	11179.6	13259.5	4647.66	7253.47	5950.56	5458.96	6469.65	5964.3	12795.8	9106.05	10950.9	3652.93	3377.6	3515.26	23865.8	15583.3	19724.6	11848.7	11409	11628.8	18567.5	12696.6	15632.1	6903.88	3633.55	5268.72
Keratin, type I cytoskeletal 9	P35527	753239	725106	739172	462247	194466	328356	100547	252258	176402	143096	125744	134420	703899	711461	707680	94702	103870	99285.9	1.16721e+06	1.05965e+06	1.11343e+06	493836	412115	452976	151363	160738	156050	348951	300570	324760	307926	269328	288627	482816	460322	471569	285091	283081	284086	318736	685236	501986	410726	383290	397008	392440	426247	409344
Neural cell adhesion molecule L1	P32004	3647.65	4825.32	4236.49	4543.35	1856.2	3199.78	5943.74	3871.26	4907.5	1882.53	7593.74	4738.13	2064.43	6373.91	4219.17	5297.44	1346.4	3321.92	4128.75	1437.81	2783.28	1256.23	3269.82	2263.02	729.16	4104.22	2416.69	6153.53	3240.9	4697.22	2491.21	5756.47	4123.84	344.057	4852.09	2598.07	827.715	3187.14	2007.43	4893.27	3008.73	3951	5909.33	1429.46	3669.39	758.215	6214.99	3486.6
Phosphatidylethanolamine-binding protein 1	P30086	2788.16	696.444	1742.3	733.361	2495.64	1614.5	1096.58	2037.82	1567.2	3032.77	4700.58	3866.68	2075.64	1014.9	1545.27	684.323	3730.86	2207.59	5081.23	2146.48	3613.85	2554.66	3517.59	3036.12	3272.5	515.882	1894.19	2781.59	608.083	1694.84	2468.76	1852.95	2160.85	685.664	2437.8	1561.73	2377.41	3770.88	3074.15	2695.47	2063.57	2379.52	1835.18	1111.03	1473.11	3057.28	1318.69	2187.99
Kallistatin	P29622	126031	107211	116621	124263	117179	120721	116838	113428	115133	93284.7	73955	83619.9	102781	142779	122780	112864	115070	113967	86949.8	100881	93915.1	154317	129542	141929	107525	105102	106313	110829	120097	115463	162523	147964	155244	111273	98805.8	105039	146197	145612	145904	123276	109385	116331	89625	88201.8	88913.4	105434	116076	110755
Serum paraoxonase/arylesterase 1	P27169	23914.7	20909.1	22411.9	17914.2	22546.4	20230.3	28634.2	24246.7	26440.5	19030.3	22356.4	20693.4	34911.2	34724.8	34818	30147.5	29023.3	29585.4	20883.5	28492.1	24687.8	27381.7	30235	28808.3	39263.4	40846.6	40055	24033.4	19630.2	21831.8	64384.7	53373.9	58879.3	16281.8	27573.5	21927.6	52855.9	44126	48491	43853.8	49789.9	46821.9	34423	38942	36682.5	36510.7	37430.2	36970.4
Zinc-alpha-2-glycoprotein	P25311	227351	221548	224449	178150	186854	182502	138938	145356	142147	174784	153766	164275	245101	267083	256092	130620	121776	126198	175215	188212	181714	349458	273501	311479	193540	189625	191583	210026	206116	208071	289883	274687	282285	130888	114992	122940	228121	215764	221943	173201	166501	169851	133006	148658	140832	156985	155510	156247
Receptor-type tyrosine-protein phosphatase zeta	P23471	92920	97869.3	95394.7	93343.9	93322.9	93333.4	63110	72812.6	67961.3	135525	129846	132685	87704.1	96555.2	92129.6	84392.2	82761	83576.6	87180.4	89916.3	88548.4	82879.5	70225.8	76552.6	57337.8	58144.2	57741	78633.9	82935.1	80784.5	38667.5	34264.2	36465.8	49357.3	55306.1	52331.7	49432.8	51205.7	50319.3	57674	52324.8	54999.4	67592.6	83307	75449.8	86085.4	82998	84541.7
Receptor-type tyrosine-protein phosphatase gamma	P23470	22201.9	17688.6	19945.2	17068.3	3942.9	10505.6	22982	16033.8	19507.9	22293	12064.5	17178.8	12542.3	8919.68	10731	18924.9	19123.5	19024.2	17846.7	13001.9	15424.3	18742.7	14781.1	16761.9	7485.34	7388.28	7436.81	13195.9	10710.9	11953.4	4961.96	9623.31	7292.64	10363.8	17179.8	13771.8	18439	15965	17202	11932.8	15086.3	13509.6	10079.8	3071.71	6575.75	19418.7	19039.6	19229.1
Receptor-type tyrosine-protein phosphatase delta	P23468	4163.42	4730.03	4446.72	3774.43	4323.5	4048.97	859.308	692.87	776.089	4356.54	6507.26	5431.9	5583.89	3191.85	4387.87	3826.53	2241.27	3033.9	1813.15	3481.28	2647.21	4793.49	3692.39	4242.94	3070.22	3682.33	3376.28	5218.68	944.339	3081.51	3003.68	2704.37	2854.03	2900.45	3798.7	3349.57	2604.31	1915.44	2259.88	3850.07	1089.29	2469.68	5002.82	6021.31	5512.07	3352.11	3549.24	3450.67
Peptidyl-prolyl cis-trans isomerase B	P23284	16033.8	20656.6	18345.2	20660.3	18708.4	19684.4	11495.9	13525	12510.4	23458.2	25694.1	24576.1	7476.23	1324.66	4400.45	13443	14040	13741.5	1496.91	14005.9	7751.4	11703.2	11282.8	11493	19120	19304.3	19212.2	14769.8	11927.8	13348.8	9201.72	10102.4	9652.07	11447.5	10737.5	11092.5	11373.3	9447.67	10410.5	702.158	13314.2	7008.18	11564.8	14773.8	13169.3	14998	14604	14801
Fibulin-1	P23142	153201	158387	155794	153157	145113	149135	139313	155479	147396	213918	209322	211620	142620	87718.4	115169	104722	81741.1	93231.8	142550	98138	120344	199649	184547	192098	113316	115986	114651	161166	144427	152796	121588	88274.4	104931	101713	98019.1	99865.9	106962	100090	103526	109750	124615	117182	141001	88520.5	114761	126188	127645	126917
Carboxypeptidase N subunit 2	P22792	10146.1	11323.4	10734.7	10217.1	15331.4	12774.3	14622.4	20218.1	17420.2	15319.6	17265.7	16292.6	8264.7	4908.68	6586.69	20041.1	19977.5	20009.3	8356.58	10756.9	9556.75	10016.2	16972.7	13494.5	17732.9	13224.3	15478.6	2494.52	30521.9	16508.2	20656	15272.4	17964.2	10078.9	12204.8	11141.8	12628.5	16442.6	14535.5	10888	12216.6	11552.3	13892.7	17843.1	15867.9	16297.6	12707.7	14502.6
Mimecan	P20774	202363	210744	206553	178010	177442	177726	223816	215964	219890	218702	197275	207988	173038	142015	157527	192646	170448	181547	264224	279400	271812	182791	161058	171925	142728	192740	167734	175185	165717	170451	234331	169320	201826	158665	157612	158138	178205	212567	195386	159159	179317	169238	196588	199400	197994	156177	198678	177427
Inter-alpha-trypsin inhibitor heavy chain H1	P19827	104403	109841	107122	52876.3	52027.7	52452	111103	107303	109203	60273.4	62331.9	61302.7	106289	132644	119467	125610	103610	114610	76206.9	94691.6	85449.2	216016	193009	204513	93566.3	84801.3	89183.8	111209	93673.2	102441	235490	211596	223543	110257	118702	114479	171882	193581	182732	90729.2	77694.6	84211.9	170966	141601	156284	110912	104073	107492
Alpha-1-acid glycoprotein 2	P19652	93384.5	95590.9	94487.7	106732	84170	95451.1	101158	80580.3	90869	138700	115572	127136	83809.9	90913.5	87361.7	77510.3	92986.5	85248.4	59562	53221.7	56391.9	85604.2	63251.4	74427.8	77604.3	62062.8	69833.6	117850	96793.2	107322	151242	139171	145207	68861.3	70438.5	69649.9	81979.2	91929.6	86954.4	148850	129262	139056	76395.2	68845.5	72620.3	45538	37646.1	41592.1
Cadherin-2	P19022	21528	25679.8	23603.9	16103.7	15065	15584.3	673.237	20657.9	10665.6	20504.6	27114.1	23809.3	21679.5	30159.3	25919.4	20791.7	20338.6	20565.1	22630.2	21762.4	22196.3	17020.1	15821.4	16420.8	12199	14936.5	13567.7	20387.5	21867.4	21127.4	2008.92	10460.8	6234.84	12041.3	10632.5	11336.9	7764.65	11719.1	9741.87	10880.5	8762.13	9821.31	21317.4	21995.4	21656.4	17699.7	20501.6	19100.6
Isoform 6 of Peptidyl-glycine alpha-amidating monooxygenase	P19021-6	84057.7	81775.2	82916.4	53467.6	72713.1	63090.4	64354.6	66061.7	65208.1	78303	79147	78725	104279	94024.1	99151.4	89900.4	88546	89223.2	84069.8	109445	96757.2	71548	73117.7	72332.8	53516.8	46197.2	49857	78920.5	47883.1	63401.8	45855.3	36069.7	40962.5	37219.7	52685.8	44952.8	35769.8	45487.2	40628.5	42570.2	26910.9	34740.5	75364.4	81155.8	78260.1	70104.1	73791.8	71948
Lipopolysaccharide-binding protein	P18428	2334.5	814.284	1574.39	628.365	1228.41	928.386	6500.76	3374.18	4937.47	580.395	1169.66	875.028	5605.59	5872.66	5739.12	556.702	4197.19	2376.95	707.417	379.618	543.517	5421.17	4679.67	5050.42	562.705	2317.64	1440.17	4671.56	5785.54	5228.55	4474.69	4866.96	4670.83	4751.59	4330	4540.8	9647.19	10647.3	10147.2	6220.79	5323.31	5772.05	1291.72	701.676	996.699	2767.46	1301.58	2034.52
Insulin-like growth factor-binding protein 2	P18065	8748.29	8165.37	8456.83	8730.56	4792.35	6761.46	9431.93	8590.3	9011.12	17629	15090.4	16359.7	10321.3	15347.8	12834.6	7472.93	5873.11	6673.02	10693.2	10147	10420.1	26601.7	14715.2	20658.5	15837.2	13138.8	14488	15456.5	14312.5	14884.5	12475.9	16353.3	14414.6	3257.75	8231.18	5744.47	8702.81	3838.31	6270.56	8271.31	8920.01	8595.66	6962.9	9297.46	8130.18	14685.2	21502.9	18094
Ganglioside GM2 activator	P17900	149015	148765	148890	92821.4	89108.5	90964.9	92066.5	104482	98274	168683	144668	156675	126706	142581	134643	90035.7	99144.1	94589.9	128148	118525	123337	130671	131211	130941	91401.1	81149.9	86275.5	142711	150277	146494	70642.3	64715.8	67679	70071.6	83164	76617.8	12537.5	66000.7	39269.1	65801.5	75425.1	70613.3	91483.1	98159.1	94821.1	88313.1	108226	98269.5
Aspartate aminotransferase, cytoplasmic	P17174	22576.1	26027.1	24301.6	22030.4	22425.2	22227.8	14504.5	6929.24	10716.8	22874.8	10315.4	16595.1	40589.8	11118.2	25854	10722.5	21997.8	16360.1	12670.9	17968.6	15319.7	29368.2	28844	29106.1	18887.2	7894.83	13391	7883.89	28581.4	18232.6	23687.6	19489.2	21588.4	11658.9	13550.8	12604.9	17605.4	20945.3	19275.4	26859.2	22119.3	24489.2	24172.4	41896.1	33034.3	22026.1	31353.3	26689.7
Carboxypeptidase E	P16870	85348	103726	94536.9	93672.8	102260	97966.2	94353.8	84570.1	89462	112898	109822	111360	81256	72337.4	76796.7	65222.1	78291.8	71756.9	108620	90414.9	99517.7	58978.9	51285.9	55132.4	76321.7	69427.4	72874.5	92802.7	73757.3	83280	36843.5	43186.4	40015	77965.1	81636.7	79800.9	73120.7	68977.6	71049.2	73006.1	67716.2	70361.2	70370.4	53701.2	62035.8	79937.9	89052.4	84495.2
Desmoplakin	P15924	80322.6	81603.3	80963	65948.6	2193.9	34071.3	87738.8	6009.01	46873.9	47092.6	3721.13	25406.8	92318.7	85679.8	88999.3	95168.7	104687	99927.6	92179	4341.53	48260.3	93915.7	4902.13	49408.9	1522.1	93026.5	47274.3	1675.57	77585.9	39630.7	139997	7395.84	73696.4	83896	89302.1	86599	69064.6	1449.91	35257.2	4339.19	66639.7	35489.4	55690.1	69883.1	62786.6	85888.7	86944.1	86416.4
Endoplasmin	P14625	72960.2	51959.6	62459.9	3480.6	27147.3	15313.9	34476.5	14241.1	24358.8	3267.01	13701.4	8484.22	11895.3	8943.94	10419.6	7742.17	63670.3	35706.2	4727.02	4060.27	4393.64	7770.95	7127.99	7449.47	8093.88	81702.8	44898.3	9058.07	10898.8	9978.42	4387.7	46541	25464.3	2031.15	1986.74	2008.94	4719.2	11094.1	7906.65	10880	2832.75	6856.39	3690.95	8834.81	6262.88	14078.2	12547.2	13312.7
Isoform M1 of Pyruvate kinase PKM	P14618-2	34919.5	58535.4	46727.4	47663.2	28955.1	38309.2	29438	45680.8	37559.4	44115.2	23323.2	33719.2	36066.6	36749.2	36407.9	34088.2	38001.5	36044.8	36660.2	39234.5	37947.3	51171.3	42270.5	46720.9	16117.2	27597.2	21857.2	42896	27406	35151	22165	13033.5	17599.2	14851.7	23724.5	19288.1	22517.9	30580.3	26549.1	27577.3	29629.8	28603.5	45677.2	61328.2	53502.7	42713.2	18582	30647.6
Nidogen-1	P14543	2091.8	4303.02	3197.41	25827.5	4534.31	15180.9	3256.4	4117.34	3686.87	5973.92	8611.7	7292.81	6235.71	6854.84	6545.28	7528.05	8325.98	7927.02	5366.68	2744.27	4055.48	7254.74	4466.34	5860.54	5441.67	4744.12	5092.89	6821.57	7557	7189.28	7391.72	9378.29	8385.01	4444.41	6230.42	5337.41	1538.59	5474.03	3506.31	31736.9	7108.99	19423	5612.53	7515.62	6564.08	6059.48	3850.1	4954.79
Complement component C6	P13671	8187.7	9064.12	8625.91	13778.3	8348.7	11063.5	2625.02	9385.23	6005.12	12322.7	6225.89	9274.29	14381.5	15271.2	14826.3	14410.7	10948.6	12679.6	3904.26	15736.7	9820.46	22623.3	25922.6	24272.9	12822.1	16840.9	14831.5	16823.5	10458.5	13641	27838.1	26143.7	26990.9	9345.26	14904.5	12124.9	17702.1	23764.3	20733.2	10720.3	14044.5	12382.4	7391.89	13268.4	10330.1	16904.5	10979	13941.8
Keratin, type II cytoskeletal 5	P13647	10216.7	7353.98	8785.34	5242.05	5927.09	5584.57	26154.1	25464.5	25809.3	11847.9	8518.29	10183.1	7850.14	28498.8	18174.5	51438.6	27171.6	39305.1	7923.83	15233.9	11578.9	7792.33	15417	11604.7	49237.2	7156.85	28197	12115.6	5856.64	8986.11	16739.5	11198.5	13969	9040.68	23066.5	16053.6	26653.5	4371.13	15512.3	8859.01	8680.41	8769.71	4657.92	6393.8	5525.86	23041.6	38824.2	30932.9
Keratin, type I cytoskeletal 10	P13645	1.54722e+06	1.57629e+06	1.56176e+06	1.17595e+06	1.17614e+06	1.17604e+06	1.08862e+06	1.12193e+06	1.10528e+06	501139	496063	498601	1.21883e+06	1.24591e+06	1.23237e+06	641250	632078	636664	2.54348e+06	2.55431e+06	2.54889e+06	667168	633201	650184	406286	376416	391351	686236	694792	690514	654890	632059	643475	787328	864892	826110	482463	503752	493108	1.45596e+06	1.37453e+06	1.41524e+06	907416	945758	926587	501904	465441	483673
Lysosome-associated membrane glycoprotein 2	P13473	23549.9	27112.7	25331.3	18352.6	19302.2	18827.4	16660.4	19701.6	18181	43601.3	44106.2	43853.7	18125.3	16754.9	17440.1	17451.8	20358.5	18905.1	18861.5	1454.86	10158.2	23193.2	26524.9	24859.1	13978.4	13695	13836.7	23524.4	22567.9	23046.1	12728.8	9839.39	11284.1	13888.8	15102.8	14495.8	16605	16715.6	16660.3	12864.6	11003.2	11933.9	17369.4	19402.3	18385.8	20195.8	19532.8	19864.3
Clusterin	P10909	2.38759e+06	2.39546e+06	2.39153e+06	1.9213e+06	1.94429e+06	1.93279e+06	2.00357e+06	1.98603e+06	1.9948e+06	2.28438e+06	2.2899e+06	2.28714e+06	1.9759e+06	2.03222e+06	2.00406e+06	1.59866e+06	1.65806e+06	1.62836e+06	2.04563e+06	2.07934e+06	2.06249e+06	1.95032e+06	1.83191e+06	1.89112e+06	1.55468e+06	1.58175e+06	1.56822e+06	1.97351e+06	2.00213e+06	1.98782e+06	1.65844e+06	1.57893e+06	1.61869e+06	1.67445e+06	1.72094e+06	1.69769e+06	1.77199e+06	1.68843e+06	1.73021e+06	1.28271e+06	1.21672e+06	1.24971e+06	1.52026e+06	1.53381e+06	1.52704e+06	1.87896e+06	1.8866e+06	1.88278e+06
Complement component C7	P10643	273078	260418	266748	250405	277013	263709	179370	180018	179694	273732	274031	273881	221777	226879	224328	189198	185628	187413	198646	210686	204666	391191	379669	385430	181890	178659	180274	208319	203750	206035	228752	245322	237037	104450	74479.5	89464.5	196068	189081	192574	157156	127735	142445	233769	221788	227779	234939	222116	228527
Complement C4-B	P0C0L5	9516.61	11167.6	10342.1	10085	7619.73	8852.37	14005.2	9604.96	11805.1	31657.9	46658.9	39158.4	13222.4	6776.08	9999.26	9485.02	10590.9	10038	8762.67	8839.19	8800.93	35104.5	30245.7	32675.1	37654.9	37004.2	37329.6	34928.9	33247.2	34088.1	44864.2	49025.1	46944.6	34005.5	35922.4	34963.9	16838.9	15419.7	16129.3	12595.1	10314.4	11454.8	45363.5	44028.9	44696.2	24411.5	28587.9	26499.7
Complement C4-A	P0C0L4	112699	113809	113254	114601	115068	114835	87101.4	64825.4	75963.4	75671.3	84984.3	80327.8	110464	141412	125938	168883	173112	170998	153726	144064	148895	460951	398463	429707	74986	94040.9	84513.5	27502.5	25904.6	26703.6	139208	139115	139161	61737	67791.9	64764.5	92827	68197.1	80512.1	143649	143984	143816	92376.6	76929.3	84652.9	93509.8	99001.3	96255.6
Complement C1s subcomponent	P09871	43986.5	77009.4	60498	61261.2	40458	50859.6	45777.8	57640.9	51709.4	117582	117923	117752	88974.2	31977.6	60475.9	46547.2	51204.7	48875.9	49427.6	99934.4	74681	60327.3	106165	83246.1	60173.4	28324.3	44248.8	78113.3	74823.3	76468.3	95571.5	89577	92574.2	39911.5	23837.6	31874.6	27109.4	59825.5	43467.5	90133.6	62630.3	76382	67726.6	74981.3	71353.9	67828.6	21535.9	44682.2
Keratin, type I cytoskeletal 16	P08779	196248	210244	203246	21564.6	29844.3	25704.5	21037.4	13982.9	17510.1	56143.7	54139.8	55141.7	49742.7	45848	47795.4	7624.1	12758.7	10191.4	79992.8	76436.5	78214.6	49257.8	59206.7	54232.2	7243.8	11290.5	9267.17	15015.2	10951.3	12983.2	16542.4	22990.2	19766.3	50063.1	47235.6	48649.3	20707.6	21135.9	20921.8	24404.6	21110.6	22757.6	23190.9	26638.3	24914.6	17187.5	17141.6	17164.5
Alpha-2-antiplasmin	P08697	69459.4	70574.9	70017.2	66250.8	62635.2	64443	75691.3	50302.6	62996.9	73655.1	64451.3	69053.2	111499	135727	123613	123578	118733	121156	114421	109062	111741	105064	77774.7	91419.2	73610.6	101900	87755.6	55497.9	64955.6	60226.7	104783	68467.1	86624.9	47224.2	61364.7	54294.5	85203	85300.6	85251.8	82500.2	94678.6	88589.4	45276.1	39321.2	42298.6	91915	89296.9	90606
Complement factor H	P08603	132130	126514	129322	97725.1	115666	106695	116033	105840	110937	192761	176199	184480	136095	136064	136080	106322	99638.2	102980	123926	104893	114409	230280	219568	224924	155470	159625	157547	128346	116582	122464	198522	193290	195906	86858.6	94266.8	90562.7	87263	95996.6	91629.8	126815	123649	125232	143396	129326	136361	173338	174026	173682
Monocyte differentiation antigen CD14	P08571	186527	176196	181361	161888	152488	157188	122097	129406	125751	190704	206283	198493	124959	116468	120713	113937	107015	110476	115458	156147	135803	249501	267137	258319	142665	116061	129363	146046	143517	144781	115799	103365	109582	85248.2	71462.9	78355.5	91273.7	78208.8	84741.3	90690	86819.4	88754.7	125443	129010	127227	96707.9	116004	106356
Extracellular superoxide dismutase [Cu-Zn]	P08294	250835	339833	295334	405215	457270	431243	386827	385541	386184	365662	428983	397322	308187	477445	392816	276748	197306	237027	373556	242235	307896	224640	233665	229153	216691	210900	213795	245086	257868	251477	388185	355010	371597	206192	297027	251610	361246	353324	357285	458151	440102	449127	229196	317105	273150	310952	311381	311166
72 kDa type IV collagenase	P08253	30254	21094.7	25674.3	31575.3	35123.8	33349.5	15421.5	9657.16	12539.3	24035	20730	22382.5	41218.5	13027.5	27123	23133.2	36506.6	29819.9	17011.2	21311.3	19161.2	24721.8	37431	31076.4	27796.2	18248.4	23022.3	22080	18231.1	20155.5	15876.7	21632.3	18754.5	18942.6	26711.5	22827.1	15947.9	10245.2	13096.6	29767.9	23609.1	26688.5	25076.6	15907.4	20492	26563.5	16624.6	21594.1
Corticosteroid-binding globulin	P08185	16577.3	17477.4	17027.3	21181.7	25687.1	23434.4	31165.3	29127.7	30146.5	26960.7	21760.9	24360.8	17651.1	26426.3	22038.7	23878.8	30111.6	26995.2	29203.2	24053.8	26628.5	34385.5	38212.8	36299.2	30729.5	25534.7	28132.1	27118.6	27039.6	27079.1	37422.8	50571.4	43997.1	35371.9	27299	31335.5	43611.9	53634.3	48623.1	2846.41	25086	13966.2	3871.21	20236.2	12053.7	27849	32120.9	29984.9
Complement component C8 gamma chain	P07360	35594.1	20353.2	27973.6	9244.8	8443.73	8844.27	19136.8	20984.1	20060.5	30778.3	4332.36	17555.4	23060.6	24026.8	23543.7	28118.7	24427.8	26273.3	10449.4	7847.28	9148.36	6793.15	18521.3	12657.2	20391.1	14942.3	17666.7	13730.2	16706.4	15218.3	47649.7	43781	45715.4	18470.4	20921.1	19695.8	26735.5	20376.1	23555.8	18002.5	27681	22841.8	14528.9	8051.26	11290.1	12034.1	19654.7	15844.4
Vitamin K-dependent protein S	P07225	181277	169914	175595	194568	195087	194828	152128	146200	149164	201300	177853	189577	143680	147258	145469	140525	146728	143627	166171	173176	169674	179088	184235	181662	134645	144979	139812	165667	167695	166681	172777	170357	171567	113744	134961	124353	118925	111183	115054	174948	137564	156256	169069	166157	167613	142924	139575	141249
L-lactate dehydrogenase B chain	P07195	115973	141606	128790	117637	114602	116120	106463	111076	108769	143970	138425	141198	121485	119367	120426	89055.3	94311	91683.2	81665.1	80570.7	81117.9	129437	114027	121732	86084.6	98279.9	92182.2	139463	129628	134546	66726.9	57894.6	62310.7	55515.5	94670.5	75093	64727.7	69334.7	67031.2	73154.7	79529.3	76342	129036	130161	129599	144175	134930	139553
Apolipoprotein A-IV	P06727	400897	400752	400824	377719	358562	368141	451901	475711	463806	257536	254482	256009	479583	516597	498090	365631	346601	356116	316787	321782	319285	598925	531284	565104	409095	417968	413531	444947	459266	452107	589765	511268	550517	492468	464986	478727	555341	684568	619954	458032	463204	460618	367465	362712	365089	254542	268738	261640
Complement C2	P06681	3512.81	2353.49	2933.15	4511.93	3152.96	3832.45	3847.98	2356.47	3102.23	2735.97	3597.3	3166.64	2062.9	1338.48	1700.69	1756.59	2668.67	2212.63	2451.13	2935.55	2693.34	3795.26	3221.89	3508.57	3618.22	1469.05	2543.64	3974.18	5760.89	4867.54	2494.37	9355.15	5924.76	692.724	3029.12	1860.92	6386.46	5100.46	5743.46	4680.55	3092.68	3886.61	5678.48	3937.36	4807.92	2446.4	2619.3	2532.85
Gelsolin	P06396	1.01656e+06	1.00818e+06	1.01237e+06	1.00989e+06	1.08599e+06	1.04794e+06	877655	897581	887618	974126	920188	947157	1.06848e+06	1.0784e+06	1.07344e+06	918615	848111	883363	918579	935567	927073	1.69393e+06	1.63641e+06	1.66517e+06	964113	934955	949534	1.13512e+06	1.15457e+06	1.14484e+06	1.12403e+06	1.00562e+06	1.06483e+06	645534	651626	648580	758619	818201	788410	837751	780432	809092	1.21766e+06	1.22256e+06	1.22011e+06	895630	901358	898494
Immunoglobulin heavy variable 4-34	P06331	4140.22	4636.27	4388.25	5136.21	1602.94	3369.58	1947.98	3593.2	2770.59	8944.37	12436.3	10690.3	4730.33	2303.87	3517.1	6448.69	6472.75	6460.72	2982.81	3693.59	3338.2	32382.1	32684.3	32533.2	36740.5	36325	36532.8	17319.4	17465.1	17392.3	41772.2	37355.9	39564.1	5771.71	6298.61	6035.16	6327.62	3179.4	4753.51	10315.2	11462.8	10889	5013.99	6135.8	5574.89	25013.2	28351.1	26682.1
Immunoglobulin kappa variable 4-1	P06312	56060.8	50209.7	53135.2	73647.3	71874.7	72761	51655.5	43648.3	47651.9	55699.4	52458.1	54078.8	76843.5	82097.1	79470.3	74864	77105	75984.5	83472.1	82644.9	83058.5	57487.7	55828.9	56658.3	99170.5	92523.5	95847	74160.8	80470.4	77315.6	130018	126237	128127	87038.8	88062.6	87550.7	76742.8	84460.5	80601.6	98305.8	86046.8	92176.3	74023.2	69152.5	71587.9	56014.5	63216.6	59615.6
Heparin cofactor 2	P05546	514296	485630	499963	355314	385545	370429	424236	519895	472065	499342	592685	546013	495168	470379	482774	550674	565755	558215	620409	628235	624322	547353	516578	531966	384191	382958	383575	502874	487895	495385	578362	552309	565336	477152	476470	476811	561885	516976	539431	433360	387184	410272	465665	469863	467764	426065	450480	438272
Thyroxine-binding globulin	P05543	29789.1	31896.5	30842.8	24536.4	29667.9	27102.2	34386	43778.7	39082.4	38798.9	43469.6	41134.3	35195.8	25622.1	30409	24310.4	26158.7	25234.5	23304.3	13770.2	18537.2	46086.5	38132.5	42109.5	23118.8	29739	26428.9	42165.9	45826.7	43996.3	59208.6	53488.6	56348.6	49226.5	42426.2	45826.4	25279.5	35226.7	30253.1	44710.6	33414.6	39062.6	15309	22730.7	19019.9	25019.6	35138.6	30079.1
Plasma protease C1 inhibitor	P05155	1.1175e+06	1.12619e+06	1.12185e+06	972347	970731	971539	873393	883754	878573	1.13231e+06	1.11193e+06	1.12212e+06	936899	988542	962720	901769	919958	910864	872831	899701	886266	1.28544e+06	1.20953e+06	1.24749e+06	819050	818675	818863	968398	957622	963010	1.12139e+06	1.03262e+06	1.077e+06	673158	695666	684412	885993	850847	868420	1.12377e+06	1.07113e+06	1.09745e+06	1.17093e+06	1.1848e+06	1.17787e+06	868014	923541	895777
Plasma serine protease inhibitor	P05154	3488.16	5655.45	4571.8	8332.9	7480.88	7906.89	11437.8	7536.8	9487.3	11953.4	4669.93	8311.66	4134.61	10436.3	7285.44	11500.2	14184.9	12842.5	3824.08	7524.26	5674.17	15165.2	13488.2	14326.7	11153.3	5550.66	8351.97	8903.84	8404.58	8654.21	10581.2	17723.3	14152.3	12613.9	9618.74	11116.3	17254.8	16133.1	16694	4956.42	7724.97	6340.7	8015	6434.4	7224.7	10002.1	8713.62	9357.84
Immunoglobulin kappa variable 3-11	P04433	93006.7	102624	97815.1	135219	130734	132976	110640	100122	105381	111799	116660	114229	156024	163910	159967	266350	266535	266443	271853	278294	275074	134758	123971	129364	229247	238353	233800	180758	175580	178169	369976	350077	360026	157168	167133	162150	316811	295519	306165	243505	238003	240754	197709	197397	197553	173519	193425	183472
Glyceraldehyde-3-phosphate dehydrogenase	P04406	16612.5	5555.32	11083.9	19531.8	13612.8	16572.3	11287.2	13271.4	12279.3	11874.2	27181.2	19527.7	21779.8	21408.3	21594.1	14079.2	10557.4	12318.3	11564.7	16310.5	13937.6	22240.6	40836.6	31538.6	14184	24343	19263.5	30395.3	30077.9	30236.6	15383.6	27521.5	21452.6	8013.42	8163.07	8088.25	12330	15234.8	13782.4	12883.5	14275	13579.3	8323.46	8301.52	8312.49	17259.3	19358.4	18308.8
Keratin, type II cytoskeletal 1	P04264	1.73716e+06	1.77555e+06	1.75636e+06	1.41819e+06	1.5473e+06	1.48274e+06	926191	921792	923992	928953	788516	858734	1.91472e+06	1.99378e+06	1.95425e+06	722490	743153	732822	3.27754e+06	3.40122e+06	3.33938e+06	1.31108e+06	1.15616e+06	1.23362e+06	500594	491487	496041	819530	934402	876966	889634	919542	904588	1.17902e+06	1.17835e+06	1.17869e+06	657319	595375	626347	1.67789e+06	1.63614e+06	1.65702e+06	1.14522e+06	1.1065e+06	1.12586e+06	722357	732597	727477
Alpha-1B-glycoprotein	P04217	684450	735866	710158	703464	825925	764694	713035	846116	779576	798271	824962	811617	1.03333e+06	1.06612e+06	1.04973e+06	759126	761836	760481	760992	734716	747854	1.15373e+06	986842	1.07029e+06	751919	728141	740030	1.01882e+06	949923	984369	1.48907e+06	1.39762e+06	1.44334e+06	1.0481e+06	1.03996e+06	1.04403e+06	1.20954e+06	1.11304e+06	1.16129e+06	848495	793134	820815	625898	593197	609548	707925	761860	734892
Immunoglobulin lambda variable 7-43	P04211	18793.3	21662.7	20228	22696	16508.6	19602.3	2490.97	13130.4	7810.67	22627.9	21721.1	22174.5	36828.4	40755.9	38792.1	41056.9	40117.4	40587.1	54314.7	50852.2	52583.5	55576.6	51527.5	53552	5372.39	2508.1	3940.25	31034.6	31341.5	31188	71811.7	59728.1	65769.9	42266.8	44745.3	43506	71067.2	68428	69747.6	38586.8	37823.5	38205.2	58654.2	61795.2	60224.7	4978.69	15313.7	10146.2
Histidine-rich glycoprotein	P04196	76932	45147.3	61039.7	57124.5	109430	83277.1	46850.8	54611.8	50731.3	52189.1	42555.2	47372.2	99973.8	52018.1	75995.9	66358.4	102508	84433.2	45640.1	41512.1	43576.1	75218.8	71081	73149.9	44965.9	90113.6	67539.7	42077.4	57712.2	49894.8	93704.9	103158	98431.5	69030.7	57434.5	63232.6	65627	131945	98785.8	58702.7	98688.3	78695.5	95679.3	38011.9	66845.6	29775.9	80255.7	55015.8
Apolipoprotein B-100	P04114	228.362	960.737	594.549	1803.97	1944.65	1874.31	1597.13	578.676	1087.9	1339.83	489.823	914.827	1601.33	425.415	1013.37	295.84	1796.44	1046.14	975.117	1218.54	1096.83	6524.21	5911.92	6218.06	498.46	337.88	418.17	926.427	284.382	605.404	2565.69	3191.99	2878.84	2232.15	406.119	1319.13	1002.8	1103.89	1053.35	1774.49	237.092	1005.79	308.726	688.902	498.814	1269.53	2641.92	1955.72
Vitronectin	P04004	269650	282648	276149	154699	166917	160808	252062	252801	252432	133156	134325	133740	249596	265340	257468	194865	200795	197830	236641	224812	230726	227170	151660	189415	175401	199638	187520	244505	240934	242719	349519	323222	336370	340148	441276	390712	543378	460165	501771	394236	280114	337175	221266	252986	237126	197550	180122	188836
Hemopexin	P02790	1.39551e+06	1.3366e+06	1.36606e+06	1.34892e+06	1.46668e+06	1.4078e+06	1.61993e+06	1.65234e+06	1.63614e+06	1.46532e+06	1.43715e+06	1.45123e+06	2.03101e+06	2.04955e+06	2.04028e+06	1.45425e+06	1.41811e+06	1.43618e+06	1.58538e+06	1.48493e+06	1.53516e+06	3.01467e+06	3.01697e+06	3.01582e+06	1.57541e+06	1.53525e+06	1.55533e+06	1.94094e+06	1.83665e+06	1.88879e+06	3.42009e+06	3.04429e+06	3.23219e+06	1.79682e+06	1.97987e+06	1.88835e+06	2.31284e+06	2.22861e+06	2.27073e+06	1.88055e+06	1.82549e+06	1.85302e+06	1.48067e+06	1.50058e+06	1.49062e+06	1.639e+06	1.73676e+06	1.68788e+06
Serotransferrin	P02787	1.69551e+07	1.75464e+07	1.72507e+07	1.45192e+07	1.47052e+07	1.46122e+07	1.42408e+07	1.45333e+07	1.4387e+07	2.04615e+07	2.09392e+07	2.07003e+07	1.85086e+07	1.43104e+07	1.64095e+07	1.77224e+07	1.74863e+07	1.76043e+07	1.20555e+07	1.05652e+07	1.13104e+07	2.43687e+07	2.19373e+07	2.3153e+07	1.45649e+07	1.45911e+07	1.4578e+07	1.37354e+07	1.81863e+07	1.59608e+07	2.37295e+07	2.18784e+07	2.2804e+07	1.46894e+07	1.48042e+07	1.47468e+07	1.68954e+07	1.62182e+07	1.65568e+07	1.44918e+07	1.42707e+07	1.43813e+07	2.14055e+07	2.09185e+07	2.1162e+07	1.58226e+07	1.63783e+07	1.61005e+07
Serum albumin	P02768	1.74896e+08	1.74619e+08	1.74758e+08	1.68898e+08	1.68941e+08	1.6892e+08	1.86673e+08	1.84624e+08	1.85648e+08	1.67476e+08	1.67659e+08	1.67568e+08	1.80968e+08	1.79263e+08	1.80115e+08	1.86512e+08	1.87622e+08	1.87067e+08	1.75004e+08	1.74368e+08	1.74686e+08	1.67583e+08	1.7342e+08	1.70502e+08	1.91068e+08	1.88797e+08	1.89933e+08	1.85754e+08	1.81908e+08	1.83831e+08	1.62545e+08	1.72554e+08	1.67549e+08	1.95062e+08	1.9463e+08	1.94846e+08	1.87393e+08	1.91406e+08	1.89399e+08	1.76337e+08	1.78076e+08	1.77206e+08	1.57529e+08	1.58218e+08	1.57873e+08	1.79188e+08	1.76682e+08	1.77935e+08
Transthyretin	P02766	5.62247e+06	5.67239e+06	5.64743e+06	8.59964e+06	8.96496e+06	8.7823e+06	6.41456e+06	6.46386e+06	6.43921e+06	6.54069e+06	6.43256e+06	6.48662e+06	4.66363e+06	4.96735e+06	4.81549e+06	2.75976e+06	2.49488e+06	2.62732e+06	4.05027e+06	4.12103e+06	4.08565e+06	5.69997e+06	4.56463e+06	5.1323e+06	4.86398e+06	4.67864e+06	4.77131e+06	5.21823e+06	5.25054e+06	5.23438e+06	4.76462e+06	4.45799e+06	4.6113e+06	4.15925e+06	4.2273e+06	4.19327e+06	4.52661e+06	4.51403e+06	4.52032e+06	5.7274e+06	5.80628e+06	5.76684e+06	5.89086e+06	6.28429e+06	6.08757e+06	6.37685e+06	6.51413e+06	6.44549e+06
Alpha-1-acid glycoprotein 1	P02763	923.461	2082.35	1502.9	989.363	1077.14	1033.25	694.946	2621.27	1658.11	2001.99	5640.62	3821.3	1355.29	3782.4	2568.84	643.816	1899.46	1271.64	1536.88	1322.52	1429.7	2807.87	2721.68	2764.78	3485.98	4957.52	4221.75	2240.54	3543.93	2892.24	6885.77	11716.5	9301.12	1642.78	1349.57	1496.17	1421.48	1823.52	1622.5	3687.56	1325.31	2506.44	2109.66	1921.21	2015.44	2540.26	4045.33	3292.79
Protein AMBP	P02760	56240.9	53933.7	55087.3	56112.7	54750.3	55431.5	50585.6	48289	49437.3	65940.9	31802.2	48871.5	96959.1	96724.3	96841.7	46473.4	57944	52208.7	40962.6	48888.8	44925.7	148179	130041	139110	85302.4	85392.7	85347.6	71098.1	78164.9	74631.5	122798	109063	115930	65570.1	64660.9	65115.5	101651	89237.1	95444.1	54454.8	54083.5	54269.2	44109.4	33347.6	38728.5	69978.3	65058	67518.1
Fibronectin	P02751	715359	778793	747076	694947	685136	690042	466480	499874	483177	635430	635760	635595	643334	678111	660722	588346	602304	595325	626580	640994	633787	1.02252e+06	923283	972900	371697	376339	374018	623224	606912	615068	494917	458144	476530	340755	377541	359148	335654	371624	353639	445302	439985	442643	727988	661687	694838	566715	595035	580875
Leucine-rich alpha-2-glycoprotein	P02750	51255	50827.5	51041.3	55516.8	44553.3	50035.1	59384.1	57076.7	58230.4	56452	50803.6	53627.8	62625.4	65257.7	63941.6	53891.3	56010.8	54951	49380.2	53224.1	51302.1	108601	102944	105772	53289.2	56829	55059.1	145030	149907	147468	105942	110552	108247	60467.8	62987.7	61727.7	153259	175216	164238	51776.7	64038.1	57907.4	47285	44393.1	45839	44279.3	50559.5	47419.4
Beta-2-glycoprotein 1	P02749	43259	38407	40833	38478.1	35147.1	36812.6	31235.5	33298.2	32266.8	61196.5	57701.3	59448.9	59451.6	58576.4	59014	30269.3	27354.5	28811.9	40754.5	38422.1	39588.3	113538	105555	109547	55181.2	63730.3	59455.8	53034.6	51254.5	52144.6	91196.3	104979	98087.7	38720.7	40864.2	39792.5	54284.8	56023.6	55154.2	30423.1	34030.7	32226.9	20111.4	29996.5	25054	61795.4	60319.3	61057.4
Complement component C9	P02748	99812.1	96131.6	97971.9	132433	116970	124702	102975	100697	101836	89491	73877.2	81684.1	90288.5	93293.5	91791	98520	104242	101381	105932	123262	114597	172975	171101	172038	87442.4	89791.4	88616.9	194752	188117	191435	165295	96641.3	130968	113475	109455	111465	240670	229785	235227	151016	150657	150837	85738.9	90971.5	88355.2	65190.9	54328.9	59759.9
Complement C1q subcomponent subunit C	P02747	267809	302601	285205	220470	218729	219599	51995.2	133540	92767.8	256296	220223	238260	132264	157022	144643	243520	129561	186540	136614	130325	133470	509359	455326	482342	59809	328682	194245	278805	289710	284257	479859	448840	464349	152140	211812	181976	249664	269127	259396	228896	166408	197652	321901	237811	279856	322552	339726	331139
Fibrinogen beta chain	P02675	69799	42401.9	56100.4	47099.1	19175.4	33137.2	51405.1	50146.8	50775.9	41748.4	40608	41178.2	65311.4	89488.4	77399.9	73949	55418.2	64683.6	52407.4	53758.6	53083	188190	148761	168476	31773.6	36918.6	34346.1	122077	126760	124419	136339	126099	131219	95620.8	100141	97881.1	169887	177740	173814	76716	86456.3	81586.2	81745.7	89957.5	85851.6	56117.6	43002.6	49560.1
Fibrinogen alpha chain	P02671	175616	88604.5	132110	47906	73236.8	60571.4	47526.7	57652.8	52589.7	53488.8	55432.9	54460.9	93993.9	105224	99608.8	122354	122714	122534	61087.6	56422.3	58755	205990	165925	185958	47758.3	102544	75151	110212	130797	120504	103223	97070.2	100147	96889.6	89684.4	93287	169674	202158	185916	134176	146844	140510	103952	78540.8	91246.5	87997	56111.9	72054.5
Apolipoprotein E	P02649	2.21932e+06	2.29265e+06	2.25599e+06	1.60788e+06	1.67339e+06	1.64064e+06	2.27718e+06	2.31879e+06	2.29799e+06	2.54114e+06	2.52405e+06	2.53259e+06	2.78824e+06	2.9207e+06	2.85447e+06	1.97028e+06	1.94731e+06	1.9588e+06	2.74536e+06	2.94982e+06	2.84759e+06	2.38977e+06	2.13687e+06	2.26332e+06	1.40105e+06	1.35528e+06	1.37817e+06	1.89183e+06	1.896e+06	1.89391e+06	1.24142e+06	1.07436e+06	1.15789e+06	1.81121e+06	1.77385e+06	1.79253e+06	1.54371e+06	1.69454e+06	1.61913e+06	1.73198e+06	1.68479e+06	1.70838e+06	2.43516e+06	2.38128e+06	2.40822e+06	1.92396e+06	1.97433e+06	1.94914e+06
Apolipoprotein A-I	P02647	851617	896275	873946	780679	811990	796335	1.42903e+06	1.41171e+06	1.42037e+06	612918	658660	635789	1.29001e+06	1.39235e+06	1.34118e+06	1.08856e+06	1.0611e+06	1.07483e+06	748130	746785	747458	1.55649e+06	1.45317e+06	1.50483e+06	1.15681e+06	1.23938e+06	1.19809e+06	1.11513e+06	1.08343e+06	1.09928e+06	2.65273e+06	2.5374e+06	2.59507e+06	1.47191e+06	1.47703e+06	1.47447e+06	1.98262e+06	1.94715e+06	1.96488e+06	1.24159e+06	1.12412e+06	1.18285e+06	1.08769e+06	1.11306e+06	1.10038e+06	803228	852778	828003
Keratin, type II cytoskeletal 6A	P02538	151908	260314	206111	59410.7	44130.1	51770.4	35662.6	34394.8	35028.7	76603.2	43532	60067.6	38313	40095.1	39204	24220.9	26301.6	25261.2	90992.3	120664	105828	57236	45475	51355.5	22750.5	20480.8	21615.7	30660.4	23762.3	27211.3	25901.1	21502.1	23701.6	84630.9	88566	86598.5	10282.5	24513.3	17397.9	45265.7	38402.7	41834.2	12407.1	63568.1	37987.6	11439.3	50381.5	30910.4
Keratin, type I cytoskeletal 14	P02533	142131	145595	143863	29824.5	32563.5	31194	17316.3	18346.4	17831.4	34854.6	32055.6	33455.1	49743.6	46358	48050.8	15193.8	12086.9	13640.3	65073.4	80199.8	72636.6	35573.3	33664.2	34618.8	16740.4	13629.2	15184.8	16954.6	16413	16683.8	14698.8	15547.4	15123.1	42409	38873.8	40641.4	19793.5	21341.3	20567.4	33672.5	36334.5	35003.5	22426.9	19908.6	21167.7	19675.7	20243.6	19959.6
Collagen alpha-1(I) chain	P02452	20357.8	24870.7	22614.2	21560.1	18208.6	19884.3	16830.5	14426.8	15628.6	22037.6	27453.5	24745.6	21994.4	26891.5	24443	20488.6	19485.4	19987	24483.8	32501.9	28492.8	19395.7	20908	20151.8	9938.21	10854.8	10396.5	16103	14671.1	15387	16456.6	12795.3	14626	11323.9	6953.82	9138.87	7985.89	8820.34	8403.12	13583.9	13580.3	13582.1	17615.1	13102.9	15359	13745.9	12598.1	13172
Ig alpha-1 chain C region	P01876	51653.3	53891	52772.2	114341	114680	114511	40141.9	39776.7	39959.3	70467.7	66772.2	68620	122273	136617	129445	135917	130121	133019	93759.5	82863	88311.3	132159	118836	125497	189277	193757	191517	108060	109463	108761	165264	152318	158791	84524.7	89334.4	86929.5	292384	283516	287950	240862	230538	235700	161621	164035	162828	113446	125216	119331
Ig gamma-4 chain C region	P01861	2233.21	3474.72	2853.97	19939.4	16843.4	18391.4	2443.97	3123.28	2783.62	14656.5	10767.1	12711.8	4731.11	3695.47	4213.29	2993.55	2504.05	2748.8	3918	2626.75	3272.38	1867.05	7390.28	4628.66	25297.6	2223.45	13760.5	2123.98	1523.12	1823.55	38928.2	36441.7	37684.9	1376.17	6477.42	3926.8	17932.1	17554.4	17743.2	2721.58	9518.54	6120.06	4126.97	4342.99	4234.98	16287	53432.5	34859.7
Ig gamma-2 chain C region	P01859	285176	279598	282387	498664	523551	511107	284692	304829	294760	492288	497652	494970	441135	474417	457776	392585	383812	388199	538891	560059	549475	516454	476630	496542	677458	652943	665200	275123	257827	266475	906186	842705	874446	298495	296896	297696	985898	968836	977367	390055	382296	386176	751714	729885	740799	507943	480521	494232
Ig gamma-1 chain C region	P01857	4.29807e+06	3.75222e+06	4.02514e+06	6.075e+06	5.94992e+06	6.01246e+06	3.23511e+06	3.07236e+06	3.15373e+06	3.54325e+06	3.39977e+06	3.47151e+06	3.60489e+06	3.68538e+06	3.64514e+06	1.11802e+07	1.09934e+07	1.10868e+07	6.73258e+06	7.22778e+06	6.98018e+06	8.10627e+06	7.27032e+06	7.68829e+06	6.76646e+06	7.02428e+06	6.89537e+06	7.49954e+06	6.65758e+06	7.07856e+06	8.85913e+06	8.54766e+06	8.70339e+06	7.32949e+06	7.13049e+06	7.22999e+06	6.52371e+06	6.06181e+06	6.29276e+06	1.07345e+07	1.05103e+07	1.06224e+07	6.17763e+06	6.20279e+06	6.19021e+06	6.24131e+06	6.14962e+06	6.19546e+06
Ig kappa chain C region	P01834	1.72943e+06	657861	1.19365e+06	2.52255e+06	2.41696e+06	2.46975e+06	1.38456e+06	1.42576e+06	1.40516e+06	1.79555e+06	1.15782e+06	1.47668e+06	1.22139e+06	2.70368e+06	1.96254e+06	3.73775e+06	3.71966e+06	3.7287e+06	3.33082e+06	3.61075e+06	3.47079e+06	4.22607e+06	3.47375e+06	3.84991e+06	5.47547e+06	5.19428e+06	5.33487e+06	2.55931e+06	2.50538e+06	2.53234e+06	6.68732e+06	6.09068e+06	6.389e+06	2.62022e+06	2.59016e+06	2.60519e+06	5.02264e+06	4.95615e+06	4.9894e+06	2.98041e+06	3.46119e+06	3.2208e+06	3.0219e+06	3.29644e+06	3.15917e+06	3.07343e+06	3.29436e+06	3.1839e+06
Immunoglobulin heavy variable 3-9	P01782	10456.3	13259.9	11858.1	6423.84	11778.9	9101.35	1025.75	7912.21	4468.98	3327.37	17697.2	10512.3	26849.2	29379.4	28114.3	44354.9	32974.1	38664.5	27991.9	23304.5	25648.2	56189.9	53802.7	54996.3	68507.4	57334.7	62921	27545.5	22068.3	24806.9	81378.2	82864.8	82121.5	32276.1	35676.9	33976.5	11970.1	13565.5	12767.8	49529.3	49961.5	49745.4	54399.9	51313.7	52856.8	25775.8	29762.7	27769.3
Immunoglobulin lambda variable 1-47	P01700	36584.6	44267.7	40426.2	47879.8	45855.9	46867.8	68482	74628.3	71555.2	41602.4	38047.4	39824.9	78527.1	74154.3	76340.7	103712	102949	103331	65712.6	69116.5	67414.5	99258.3	87252.8	93255.5	40476.2	43599	42037.6	57082.9	59749.7	58416.3	91796.3	86758	89277.2	105758	103696	104727	106040	98091.4	102066	80300.6	77043.8	78672.2	80508.9	64936.4	72722.7	64887.3	67227.6	66057.5
Immunoglobulin kappa variable 3-15	P01624	160101	166670	163386	315595	2184.1	158889	4144.27	141362	72753.2	13411.6	182539	97975.3	239024	234108	236566	2076.91	23764.4	12920.7	324163	355921	340042	6722.45	191963	99342.8	370641	374575	372608	235272	18369.9	126821	483184	447956	465570	258176	268706	263441	472183	21360.7	246772	450798	439360	445079	369033	375456	372244	18252.6	267129	142691
Immunoglobulin kappa variable 3-20	P01619	161451	168521	164986	329112	315968	322540	202435	196825	199630	213718	224457	219087	386850	380067	383459	339322	332986	336154	280279	312583	296431	267252	241683	254468	454779	457108	455943	287419	287481	287450	550418	532153	541286	288228	299515	293871	442413	424148	433281	484200	461765	472982	665275	641003	653139	323412	328610	326011
Immunoglobulin kappa variable 2D-28	P01615	68414.7	67121.1	67767.9	58045.4	55851.6	56948.5	84217.8	77398.4	80808.1	75284	77346.8	76315.4	115652	127247	121450	123350	110173	116762	174934	202869	188901	178233	165338	171786	141887	146550	144218	55246.2	46024.1	50635.1	263407	231547	247477	118169	128866	123517	198813	184430	191622	138219	130303	134261	141335	127456	134396	80204.7	72804.9	76504.8
Immunoglobulin kappa variable 1D-12	P01611	3462.79	4603.07	4032.93	1169.79	8290.74	4730.26	1166.39	1526.07	1346.23	9516	1291.66	5403.83	2554.25	7278.92	4916.58	8448.69	7310.92	7879.81	5268.36	11233.1	8250.71	13999.8	13089.5	13544.7	19656.3	14440	17048.1	2388.27	10323.3	6355.76	20485.4	18995.2	19740.3	2766.57	6073.51	4420.04	1520.56	7078.52	4299.54	1366.28	1296.63	1331.45	7182.13	6863.35	7022.74	1104.36	794.823	949.593
Immunoglobulin kappa variable 1-5	P01602	9881.9	1947.67	5914.79	4285.22	7658.76	5971.99	5142.32	8144.96	6643.64	18923	20932.4	19927.7	39097.3	39152.7	39125	20711.6	19527.7	20119.7	55159.2	63068.6	59113.9	6240.95	466.916	3353.93	6260.17	1527.18	3893.68	589.21	3298.88	1944.05	1007.33	5551.04	3279.19	2917.7	2181.12	2549.41	687.838	9004.19	4846.01	7966.76	11663.8	9815.26	10291.9	6109.45	8200.65	6734.95	6555.71	6645.33
Immunoglobulin kappa variable 1-33	P01594	1003.32	1394.9	1199.11	4221.64	721.236	2471.44	1571.35	797.197	1184.27	2802.36	2874.64	2838.5	2294.08	1227	1760.54	5751.01	2344.58	4047.8	2085.43	2482.64	2284.04	6362.36	828.927	3595.64	8553.38	7062.29	7807.84	1161.04	1498.85	1329.95	1516.87	2047.19	1782.03	3206.03	4907.17	4056.6	869.877	1468.03	1168.95	1072.03	1191.18	1131.61	1842.1	2119.47	1980.78	920.368	1476.61	1198.49
Insulin-like growth factor II	P01344	1230.9	2140.4	1685.65	859.726	855.661	857.693	1426.81	2166.53	1796.67	9017.57	10938.9	9978.25	1568.55	2308.42	1938.48	999.824	486.622	743.223	2352.66	5177.4	3765.03	18491.8	12620.7	15556.2	11685	13399.3	12542.2	3639.2	1962.54	2800.87	14983.3	10866.5	12924.9	2182.21	707.581	1444.89	845.295	1427.33	1136.31	732.645	1751.57	1242.11	1896.61	1238.29	1567.45	11415.3	10291.1	10853.2
Isoform LMW of Kininogen-1	P01042-2	291434	316912	304173	239622	248527	244075	274791	304573	289682	274290	286498	280394	398655	389585	394120	303301	316358	309830	299358	283321	291339	578734	538875	558804	357473	361951	359712	400834	403426	402130	665558	617308	641433	422281	443104	432693	482858	460152	471505	347543	353119	350331	276032	274549	275291	279816	292392	286104
Cystatin-C	P01034	731065	686586	708825	596933	590183	593558	478334	415405	446869	474295	485918	480107	485189	468924	477056	316009	348459	332234	327115	350207	338661	1.33189e+06	1.04472e+06	1.18831e+06	640114	618510	629312	809761	747899	778830	456581	417704	437143	391648	421900	406774	473790	442803	458297	374232	379852	377042	859636	901579	880607	703700	676690	690195
Complement C5	P01031	57617.3	46872.3	52244.8	57552.5	50212.1	53882.3	68411.9	79451.2	73931.6	51602.1	47627.3	49614.7	63102.8	77735.9	70419.4	95868.1	75008.7	85438.4	56641.6	57400.5	57021.1	93519.9	90654.6	92087.2	56945.5	64168.1	60556.8	81568.5	77617.6	79593	94450.2	105377	99913.6	72408.3	77742.8	75075.5	124596	126333	125464	71455.6	90566.2	81010.9	69717.7	69857.8	69787.8	56512.9	56869.4	56691.1
Complement C3	P01024	2.85737e+06	2.9037e+06	2.88053e+06	2.82942e+06	2.85097e+06	2.8402e+06	2.44061e+06	2.54229e+06	2.49145e+06	3.09804e+06	3.04128e+06	3.06966e+06	3.65877e+06	3.74739e+06	3.70308e+06	2.82607e+06	2.75536e+06	2.79072e+06	2.54102e+06	2.64861e+06	2.59482e+06	3.75915e+06	3.45001e+06	3.60458e+06	2.68638e+06	2.69153e+06	2.68895e+06	2.59019e+06	2.54623e+06	2.56821e+06	4.4392e+06	4.05253e+06	4.24586e+06	2.94341e+06	3.02974e+06	2.98657e+06	3.5893e+06	3.46317e+06	3.52623e+06	3.51527e+06	3.32697e+06	3.42112e+06	3.62714e+06	3.61139e+06	3.61926e+06	2.36653e+06	2.41722e+06	2.39187e+06
Alpha-2-macroglobulin	P01023	2.02957e+06	1.75177e+06	1.89067e+06	1.95368e+06	1.93872e+06	1.9462e+06	1.71198e+06	1.7989e+06	1.75544e+06	3.05113e+06	3.0631e+06	3.05712e+06	1.80786e+06	1.90581e+06	1.85684e+06	1.58123e+06	1.59865e+06	1.58994e+06	2.00383e+06	2.05364e+06	2.02874e+06	2.94871e+06	2.65303e+06	2.80087e+06	1.34229e+06	1.34202e+06	1.34215e+06	1.92708e+06	1.91807e+06	1.92257e+06	1.29631e+06	1.21345e+06	1.25488e+06	1.22821e+06	1.29266e+06	1.26043e+06	1.22964e+06	1.22815e+06	1.22889e+06	1.66196e+06	1.70459e+06	1.68327e+06	2.58267e+06	2.49768e+06	2.54017e+06	2.03114e+06	2.13357e+06	2.08236e+06
Angiotensinogen	P01019	3.84683e+06	3.94939e+06	3.89811e+06	3.80625e+06	3.92478e+06	3.86551e+06	2.8091e+06	2.69929e+06	2.7542e+06	5.23712e+06	5.22042e+06	5.22877e+06	2.08882e+06	2.17473e+06	2.13177e+06	2.31432e+06	2.23393e+06	2.27412e+06	2.59e+06	2.77747e+06	2.68374e+06	3.72531e+06	3.30116e+06	3.51323e+06	2.49927e+06	2.52933e+06	2.5143e+06	3.25852e+06	3.1543e+06	3.20641e+06	1.78561e+06	1.64293e+06	1.71427e+06	2.40909e+06	2.47179e+06	2.44044e+06	2.75974e+06	2.62923e+06	2.69449e+06	2.05225e+06	1.98427e+06	2.01826e+06	2.8705e+06	2.71764e+06	2.79407e+06	3.91276e+06	3.87214e+06	3.89245e+06
Alpha-1-antichymotrypsin	P01011	1.73384e+06	1.81095e+06	1.77239e+06	2.1885e+06	2.13645e+06	2.16248e+06	1.40864e+06	1.47041e+06	1.43953e+06	1.82594e+06	1.87174e+06	1.84884e+06	2.0931e+06	2.14625e+06	2.11967e+06	2.29379e+06	2.33815e+06	2.31597e+06	1.46059e+06	1.44071e+06	1.45065e+06	2.60602e+06	2.51263e+06	2.55933e+06	1.35546e+06	1.37461e+06	1.36504e+06	2.32337e+06	2.40377e+06	2.36357e+06	2.63335e+06	2.46337e+06	2.54836e+06	1.38674e+06	1.36799e+06	1.37736e+06	2.40819e+06	2.32661e+06	2.3674e+06	2.1849e+06	2.13429e+06	2.15959e+06	1.74777e+06	1.7076e+06	1.72768e+06	1.24982e+06	1.25035e+06	1.25009e+06
Alpha-1-antitrypsin	P01009	22180.3	25480.5	23830.4	27498.7	51392.8	39445.7	1278.84	56947.9	29113.4	24036.6	43214.4	33625.5	65509.8	104789	85149.5	47373.7	70993.3	59183.5	37103.7	34866.1	35984.9	31832.7	32609.9	32221.3	78544.3	83911.1	81227.7	79374.6	101892	90633.3	52653.5	102072	77362.7	95491.4	135850	115671	94842.2	74110.5	84476.3	32533.7	34894.1	33713.9	54563.3	61351.8	57957.5	7168.95	37009.6	22089.2
Antithrombin-III	P01008	862523	849577	856050	799873	831164	815519	842646	832645	837646	665939	633807	649873	872375	870123	871249	731773	739545	735659	873451	950197	911824	1.10231e+06	1.00671e+06	1.05451e+06	853226	880467	866846	819825	820257	820041	1.38328e+06	1.2724e+06	1.32784e+06	821853	833924	827888	1.19999e+06	1.15156e+06	1.17577e+06	941097	963253	952175	831452	830930	831191	869779	937245	903512
Coagulation factor XII	P00748	53073.8	62051	57562.4	67450.7	55432.1	61441.4	27034.7	731.204	13882.9	76431.3	79875.2	78153.2	104688	110443	107566	73408.5	89652.9	81530.7	83819.4	76679.3	80249.4	68494.6	74084.9	71289.8	47355.2	47677.8	47516.5	57955.8	61424.4	59690.1	149723	142385	146054	97309.9	87448.4	92379.2	107218	93082.2	100150	86021.4	82422.3	84221.9	63312.7	58694.7	61003.7	58412.1	62154.7	60283.4
Plasminogen	P00747	363648	354623	359135	289061	250767	269914	385585	367364	376474	343080	322791	332936	481690	552860	517275	462029	475302	468666	434460	384676	409568	649326	596724	623025	409034	417630	413332	387007	415642	401325	890362	821844	856103	417739	450671	434205	691385	672689	682037	394404	430369	412386	432515	406108	419312	439004	429170	434087
Coagulation factor X	P00742	29798.4	3524.26	16661.3	15902	19048.2	17475.1	6161.06	6266.77	6213.91	12327.2	19595.4	15961.3	6643.68	19018.4	12831	10632.3	11045	10838.7	4563.1	3294.12	3928.61	79156.8	3337.79	41247.3	48535.6	9903.5	29219.6	26862	33373.1	30117.5	105771	105528	105649	36180.5	35698.9	35939.7	100597	6189.12	53393.2	5548.23	5379.39	5463.81	3674.44	7836.69	5755.56	4095.62	7102.74	5599.18
Coagulation factor IX	P00740	6215.89	4199.71	5207.8	3600.22	5653.27	4626.74	1119.29	1227.04	1173.17	3120.81	7249.24	5185.03	7478.66	7362.19	7420.43	4200.31	2016.86	3108.59	3747.04	4294.51	4020.78	9316.54	10677.7	9997.1	5654.08	7670.58	6662.33	10611.9	397.788	5504.84	8549.02	10526.4	9537.71	7591.63	7266.59	7429.11	6450.87	7016.72	6733.8	8631.22	6295.25	7463.24	3899.55	4730.81	4315.18	6357.84	6038.21	6198.03
Haptoglobin	P00738	763260	792784	778022	2.14603e+06	2.12062e+06	2.13333e+06	563188	603511	583349	740734	701265	720999	554240	587703	570971	694016	671996	683006	803553	830790	817171	531161	459306	495233	837359	824114	830736	267534	287933	277733	964017	859941	911979	1.29614e+06	1.31259e+06	1.30436e+06	1.66418e+06	1.6422e+06	1.65319e+06	627524	615426	621475	1.12765e+06	1.09019e+06	1.10892e+06	1.15188e+06	1.21972e+06	1.1858e+06
Prothrombin	P00734	44521.1	80862.5	62691.8	58351.6	61872.4	60112	79644.3	85499.2	82571.7	49561.7	52956.9	51259.3	90344.1	105283	97813.7	86739.9	124778	105759	103505	113292	108399	176370	162795	169582	101490	101540	101515	90045.5	118857	104451	207974	192792	200383	78777.9	87939.7	83358.8	125732	101009	113371	83062.6	82272.5	82667.6	65999.7	62073.1	64036.4	91273.4	87114.7	89194
Phosphoglycerate kinase 1	P00558	4091.17	2617.95	3354.56	7421.55	5382.64	6402.1	621.605	875.691	748.648	2692.71	3309.69	3001.2	3173.87	2612.98	2893.42	1559.89	393.676	976.784	2488.49	3314.96	2901.73	4335.82	4316.91	4326.36	3381.27	858.48	2119.87	574.176	552.208	563.192	492.711	774.261	633.486	2003.41	1586.12	1794.76	527.176	425.728	476.452	503.048	3143.11	1823.08	662.906	2987.87	1825.39	2629.03	3660.93	3144.98
Ceruloplasmin	P00450	272709	241550	257130	279688	285908	282798	305791	307232	306511	318845	319768	319306	276958	304615	290787	261460	254265	257863	271434	265923	268679	563402	467871	515636	214043	223432	218737	414791	390124	402457	506825	470583	488704	249596	236621	243109	402005	372865	387435	290649	274191	282420	250468	237528	243998	244645	222436	233541
Superoxide dismutase [Cu-Zn]	P00441	529.083	3029.71	1779.4	7888.88	10761.4	9325.12	7881.47	4831.87	6356.67	13757.9	12940.4	13349.2	13648.7	16327.3	14988	5120.64	11721.8	8421.23	1417.87	14243.1	7830.48	13439.1	10100.4	11769.7	1031.02	9315.32	5173.17	13751.8	3010.78	8381.27	3336.18	4000.39	3668.29	6099.37	1706.33	3902.85	869.056	3209.49	2039.27	3176.65	3670.96	3423.8	8261.78	1187.31	4724.55	9877.92	8829.68	9353.8
Neuronal pentraxin receptor	O95502	142680	142138	142409	110165	102560	106362	104052	99359.7	101706	179491	165952	172721	122808	133415	128111	130777	120562	125669	90389.2	155175	122782	100109	92861	96485.2	47868.3	44891.2	46379.8	134604	127693	131149	51086.4	41458.2	46272.3	68764.8	72168.9	70466.9	46447.1	57580.7	52013.9	49770.8	47593.1	48682	79063.7	76442.8	77753.2	138592	135978	137285
Isoform 2 of Calsyntenin-1	O94985-2	663029	584176	623602	467909	460754	464331	459998	518586	489292	668481	971425	819953	461140	663453	562297	391552	398735	395144	493365	525439	509402	511728	455445	483587	515499	375995	445747	469686	475472	472579	363513	235864	299688	310642	334183	322412	304048	304471	304259	329985	406305	368145	728708	470065	599386	593938	660710	627324
Extracellular matrix protein 2	O94769	188588	43854.5	116221	265406	48204.3	156805	39005.3	32954.9	35980.1	38885.3	184024	111455	34465.7	32377	33421.3	50009.6	44507.5	47258.6	43230	17242.5	30236.3	32679.2	33129.1	32904.2	26295	25870.6	26082.8	32755.4	30930.4	31842.9	20211.3	124334	72272.9	20839.9	29255.6	25047.7	27922.8	36353.1	32137.9	37063.6	38324.9	37694.3	245672	36166.4	140919	29493.9	31057.4	30275.6
Attractin	O75882	34304.5	28769.8	31537.1	20885.3	26806.8	23846	20172.6	33552.2	26862.4	48455.9	39570.4	44013.1	25720.6	25976.6	25848.6	37391	26925.9	32158.5	12001.6	39982.5	25992	30314.3	29405	29859.7	18795.3	26153.3	22474.3	34172.7	38039.6	36106.2	22460.1	30677.9	26569	30801.4	21915.4	26358.4	29623.7	30702.6	30163.2	24937.9	15579.1	20258.5	17014.1	17091	17052.5	41476.6	34863.9	38170.2
Scrapie-responsive protein 1	O75711	2256.46	3202.34	2729.4	6143.32	12877.1	9510.2	6677.6	2276.19	4476.9	41848.5	7840.04	24844.3	64482.1	40622.6	52552.4	35101.9	7957.21	21529.6	47788.3	32041.2	39914.8	39902.1	47654.9	43778.5	1602.43	108545	55073.7	3588.76	37320	20454.4	33355.3	17481.5	25418.4	32605.4	2578.8	17592.1	33867.9	31005.3	32436.6	31488.7	4869.99	18179.3	99043.4	110638	104841	5187.26	4634.14	4910.7
Semaphorin-7A	O75326	34709.5	40727.2	37718.3	29629.2	22966.1	26297.7	23707.5	24634.3	24170.9	52732.2	59274.1	56003.1	14742.8	18514.3	16628.5	14690.4	24510.5	19600.4	22762	18021	20391.5	33233.3	27947.7	30590.5	18651.9	25181	21916.5	47098.1	38506.6	42802.4	25285.9	17512.7	21399.3	21308.2	29317.4	25312.8	27526.6	25448.8	26487.7	17005.6	21225.1	19115.3	13711	28272.8	20991.9	35491.6	43006.6	39249.1
Germinal-center associated nuclear protein	O60318	26721.3	29320.7	28021	53893.7	47004.3	50449	52818.5	43159.2	47988.9	26282.6	20254.5	23268.6	110874	104972	107923	25206.6	30067.4	27637	159598	151168	155383	21864.3	23120.9	22492.6	22868.2	25526.5	24197.4	36703.6	39970.2	38336.9	2.67517e+06	2.44316e+06	2.55916e+06	21808.3	22965	22386.7	15866.6	12973.4	14420	16655	17895.2	17275.1	1.25727e+07	1.26557e+07	1.26142e+07	50626.8	56024.8	53325.8
Beta-1,4-glucuronyltransferase 1	O43505	513443	522813	518128	404519	402120	403319	367587	360226	363907	750863	634453	692658	476581	436649	456615	442308	458696	450502	670362	703045	686704	319142	303406	311274	253074	262180	257627	455779	486087	470933	223250	168051	195650	276351	312190	294270	253886	242457	248171	231544	178388	204966	320226	350282	335254	359140	428167	393653
Neurocan core protein	O14594	43157.4	65026.8	54092.1	52317.2	30417.2	41367.2	35761.9	33606.1	34684	47223.8	83040.4	65132.1	43462.5	49282.8	46372.7	48151.4	37182.2	42666.8	36026	34715.5	35370.7	49092.8	37643.1	43368	21502.9	22579.9	22041.4	41728.3	42840.9	42284.6	26222.6	18994	22608.3	24100.2	24163.1	24131.7	26594.2	21847	24220.6	47869	24420.7	36144.9	35714.4	32302.6	34008.5	41156.6	41302.3	41229.4
Immunoglobulin superfamily containing leucine-rich repeat protein	O14498	73977.3	70788.2	72382.7	58339.4	64077.8	61208.6	46438.3	46746.2	46592.3	68593.8	63751.7	66172.8	27553.4	24560.5	26056.9	64710.8	60992.2	62851.5	51290.3	30004.6	40647.5	68199.5	60921.7	64560.6	47092.6	48710.7	47901.7	57499.1	51616.6	54557.9	50050.9	37348.2	43699.6	50558	43093.8	46825.9	47849.9	45705.4	46777.6	63293.8	64879	64086.4	68611.6	68341.6	68476.6	55868.2	61229.3	58548.7
Beta-mannosidase	O00462	702.085	1218.9	960.491	3612.66	760.778	2186.72	2284.84	599.056	1441.95	8671.37	3147.47	5909.42	1592.59	3892.24	2742.41	3146.33	7308.9	5227.61	4518.47	4350.33	4434.4	15172	11705.9	13439	15638.1	17375	16506.6	1406.04	3970.96	2688.5	3892.6	26731.6	15312.1	4299	1099.01	2699.01	925.746	1771.52	1348.63	6330.49	7681.17	7005.83	2465.76	2803.72	2634.74	6088.75	5353.3	5721.03
Sulfhydryl oxidase 1	O00391	18652.5	9084.21	13868.3	15203.7	12065.7	13634.7	16537.2	20653.8	18595.5	23539.8	18060.7	20800.3	10505.3	9108.3	9806.79	10321.5	2671.61	6496.53	26239.2	19745.8	22992.5	25348	21812	23580	18351	8729.9	13540.4	22148.7	17319.5	19734.1	13898.9	13441.7	13670.3	17004	14544.6	15774.3	16375.5	7740.04	12057.8	15959.3	20293.4	18126.4	17886.9	22894.7	20390.8	21046.3	21068.8	21057.6
Epidermal growth factor receptor substrate 15-like 1	M0R2S2	15980.1	21168.8	18574.4	20585.7	18405	19495.3	5739	26329.4	16034.2	21822.6	25740	23781.3	42843.2	43862.9	43353.1	54315.7	45957.3	50136.5	55743.9	47407	51575.4	56109.4	49639.7	52874.6	56907.4	49454.7	53181.1	32567.6	38747.8	35657.7	104610	102983	103796	38847.2	32459.9	35653.6	57138.9	53719.3	55429.1	52673.2	46037.2	49355.2	35962.5	37030.9	36496.7	20478.1	2329.88	11404
Complement factor D	K7ERG9	27658.1	28690	28174	33330.7	37681.2	35506	33729.3	21811.9	27770.6	29883.1	30181.1	30032.1	36855.7	27120.4	31988.1	28301.6	24651.1	26476.3	19907.3	22206.7	21057	49580	47359.4	48469.7	33689.3	35236.5	34462.9	31123.2	31792.5	31457.9	34933.6	29218.9	32076.3	15316	20204.5	17760.3	26187.9	26633.2	26410.6	30112.5	21676.2	25894.4	31664.4	34713.2	33188.8	17439.1	23187.5	20313.3
Glucosidase 2 subunit beta	K7ELL7	839.025	1876.55	1357.79	1559.78	2391.51	1975.64	1669.35	1457.31	1563.33	302.332	2910.86	1606.6	1380.73	4958.15	3169.44	1526.77	814.054	1170.41	1434.04	2016.62	1725.33	2211.21	747.469	1479.34	2079.57	684.497	1382.03	1839.39	1480.28	1659.84	749.459	2156.2	1452.83	588.381	3100.11	1844.25	959.277	950.932	955.104	732.871	1436.19	1084.53	4802.72	581.068	2691.89	940.198	985.937	963.068
Bifunctional arginine demethylase and lysyl-hydroxylase JMJD6	K7EJU9	935.557	2281.75	1608.65	755.31	942.074	848.692	3222.71	2325.62	2774.16	5753.73	2071.31	3912.52	4409.77	4292.96	4351.36	3018.54	2905.74	2962.14	3441.62	3634.71	3538.17	2078.63	3133.76	2606.19	1171.23	2872.59	2021.91	4723.34	1141.99	2932.66	1781.66	6271.82	4026.74	1364.83	871.418	1118.12	1872.43	2304.42	2088.43	2540.98	2437.95	2489.46	1619.15	2109.69	1864.42	1126.97	1460.42	1293.69
Phosphatidylcholine-sterol acyltransferase (Fragment)	J3QSE5	36829.8	38711.8	37770.8	21519.3	25518	23518.6	19591.9	27137.3	23364.6	28348.5	28187.3	28267.9	24485.9	26688.8	25587.4	27693.9	21259.5	24476.7	30851.7	30010.6	30431.2	17767.1	14463.6	16115.4	17209.6	22313.4	19761.5	28629	20738	24683.5	18959.5	20869.4	19914.5	29997.7	30634.9	30316.3	24514.9	21922	23218.5	16910.2	21751.7	19331	25490.6	21202.7	23346.6	36742.2	38678.3	37710.2
Reelin	J3KQ66	135587	166582	151085	166064	145504	155784	82389.8	140325	111358	314740	271313	293027	88367.5	94884.6	91626	138205	120400	129302	224346	191626	207986	75432.4	89444.2	82438.3	106867	111298	109082	158256	147924	153090	69717.1	61386.9	65552	140947	124912	132930	100240	71743	85991.7	129812	123788	126800	124502	115405	119954	261549	249405	255477
RGM domain family member B	J3KNF6	6698.57	6686.08	6692.33	1036.89	7895.64	4466.26	5567.63	1156.23	3361.93	3275.9	1242.25	2259.07	2969.25	877.855	1923.55	7156.76	6805.67	6981.22	5251.56	5485.04	5368.3	2695.83	792.275	1744.05	3796.72	383.251	2089.98	5506.04	403.452	2954.75	2610.07	3732.1	3171.08	1053.44	1229.17	1141.3	4517.48	3659.02	4088.25	573.289	3445.85	2009.57	848.255	6330.62	3589.44	1262.26	477.563	869.914
Epididymal secretory protein E1	J3KMY5	11352.8	15115.8	13234.3	13626.3	15455.5	14540.9	2510.47	9166.6	5838.53	36061.4	34522.2	35291.8	2243.08	16662	9452.52	9418.6	9978.75	9698.67	10383.8	11638.1	11011	33298.8	31300.6	32299.7	24419.9	26747.8	25583.8	10274.1	14151.1	12212.6	13325.4	13162.8	13244.1	9060.49	8898.4	8979.45	9290.45	10184.3	9737.39	12494.7	1904.75	7199.72	13941.3	9300.07	11620.7	34035.3	29681	31858.1
Sex hormone-binding globulin	I3L1J1	1053.34	3636.36	2344.85	2352.84	1698.21	2025.53	2945.76	3418.26	3182.01	3513.3	2626.05	3069.68	567.387	3332.77	1950.08	754.347	437.622	595.985	3106.72	5191.68	4149.2	4403.37	4239.27	4321.32	2923.16	3314.75	3118.95	697.217	3443.3	2070.26	5339.84	3619.16	4479.5	411.184	1984.64	1197.91	704.399	945.665	825.032	2191.39	1059.79	1625.59	1872.87	1769.17	1821.02	795.133	3282.01	2038.57
Neural cell adhesion molecule 2	H9KV31	81849.7	97379.9	89614.8	61063.3	65448.3	63255.8	50593.5	60225.5	55409.5	65971.5	92467.8	79219.6	53801.7	80791.2	67296.5	64751.5	72861.6	68806.6	61952.3	69728.8	65840.5	99088.1	92255.4	95671.8	58137.5	55866.6	57002	67584.9	70626	69105.5	43827.4	37772.1	40799.8	29035.4	35828	32431.7	42750.6	38133.1	40441.8	60029	32846.3	46437.6	101693	110089	105891	90907.1	88766.6	89836.9
Reticulon-4 receptor (Fragment)	H7C215	3839.01	2208.3	3023.66	1843.47	3027.29	2435.38	2044.41	1031.24	1537.82	6153.69	5049.83	5601.76	1467.65	2958.39	2213.02	3842.18	4089.03	3965.61	4373.37	6152.83	5263.1	849.26	1895.98	1372.62	1303.22	2388.07	1845.64	848.085	2531.39	1689.74	2131.94	1174.94	1653.44	1826.42	3726.89	2776.65	1485.28	1458.1	1471.69	2064.97	1988.89	2026.93	2116.58	2480.74	2298.66	1824.29	5202.45	3513.37
Collagen alpha-1(XVIII) chain (Fragment)	H7BXV5	41444.8	36005.1	38724.9	41882.7	45040.3	43461.5	24188.4	28335.3	26261.9	37239.8	39051.7	38145.8	28529.7	35034	31781.9	33951.6	34131.8	34041.7	33166	25639.8	29402.9	35181.9	37733.3	36457.6	20905.4	20668.9	20787.2	26525.3	29052.3	27788.8	21951.8	20519.3	21235.5	20404.1	10491.8	15448	30497.3	23110.6	26803.9	25315	32528.1	28921.6	36662.6	34200.3	35431.4	28181.7	24463	26322.3
Beta-hexosaminidase	H3BS10	2616.93	29014	15815.5	967.175	2188.26	1577.72	2013.45	26206.8	14110.1	37946.8	1598.19	19772.5	30956.5	4397.13	17676.8	29634.1	4167.67	16900.9	15445.2	3061.98	9253.58	30804.8	27189.2	28997	21245.5	1609.78	11427.6	6225.98	26116	16171	4887.04	2430.75	3658.9	22544.8	4038.01	13291.4	1336.7	1760.41	1548.55	3115.64	2288.59	2702.11	2105.97	2851.68	2478.83	28146.7	23380.6	25763.7
Nidogen-2 (Fragment)	H0YJV3	8529.98	5700.79	7115.39	15011.6	11752	13381.8	4910.8	7438.17	6174.49	4868.84	15493.8	10181.3	12820.7	3979.72	8400.23	2099.11	37853	19976	547438	30043.9	288741	39258.1	7991.27	23624.7	219092	3440.63	111266	5826.25	16740.2	11283.2	7875.61	10085.1	8980.34	4279.52	1432.99	2856.25	2456.99	1938.61	2197.8	9037.88	5714.38	7376.13	256904	8189.19	132547	9718.05	10922.6	10320.3
Complement C1r subcomponent-like protein (Fragment)	H0YFL7	969.295	3038.81	2004.05	512.404	2817.47	1664.94	894.717	1155.71	1025.21	573.237	2670.88	1622.06	2536.37	912.137	1724.25	914.518	3147.99	2031.25	1945.04	2565.6	2255.32	5344.42	3939.2	4641.81	2090.76	2259.15	2174.95	3182.14	947.885	2065.01	4340.36	716.539	2528.45	2022.12	498.003	1260.06	4992.72	1134.41	3063.56	2394.76	3913.08	3153.92	2556.87	872.455	1714.66	719.009	1216.04	967.524
SAC3 domain-containing protein 1 (Fragment)	H0YEW7	7049.69	1305.7	4177.69	6256.49	5971.49	6113.99	1420.56	10979.6	6200.08	10515	10910.3	10712.7	9549.17	2973.53	6261.35	9338.94	2532.86	5935.9	10537.2	10280.9	10409	435.007	1278.08	856.544	6973.61	3236.68	5105.15	2090.74	5699.57	3895.15	14010.7	12222	13116.3	5847.9	1018.83	3433.37	6759.71	6621.4	6690.56	2202.41	9956.72	6079.57	5858.8	7825.68	6842.24	1516.58	8353.73	4935.16
CD44 antigen (Fragment)	H0YDW7	19897.7	20260	20078.9	2164.02	21279	11721.5	14155.1	18472.3	16313.7	32249.5	29909.3	31079.4	13487.2	12778.9	13133	11280.7	14078.7	12679.7	11878.6	12544.9	12211.7	38944.3	33066.9	36005.6	16582.6	17071	16826.8	22019.5	22937.5	22478.5	15415.9	13045.3	14230.6	11778	13864.4	12821.2	12424	11035.4	11729.7	9225.73	9999.25	9612.49	17366.7	20798.3	19082.5	17447.1	17903.3	17675.2
Plasma kallikrein (Fragment)	H0YAC1	23975.9	24552.3	24264.1	12281.7	21849.9	17065.8	25530.7	22419.5	23975.1	22904.4	29639.8	26272.1	32793.7	30356.3	31575	14589.2	25652.1	20120.6	34920.7	27240.4	31080.6	39312.6	40161.2	39736.9	31847.1	23759.4	27803.3	4844.89	20347.6	12596.3	38153	29770	33961.5	18536.5	16057.2	17296.8	20416.8	32207.3	26312.1	21645.8	36979.9	29312.9	26584.2	22953.5	24768.9	34649.3	40928.4	37788.8
Prostaglandin-H2 D-isomerase (Fragment)	H0Y5A1	130113	131481	130797	105045	109344	107194	83858.7	94022.8	88940.7	100138	101661	100900	91623.6	109757	100690	94811.5	91556.6	93184.1	89162.7	101968	95565.4	142488	111413	126951	84162	71198.7	77680.3	79001.4	1290.68	40146.1	68536.6	66428.9	67482.7	77003.3	79991.8	78497.6	65720.5	62214.9	63967.7	1724.97	61075.7	31400.3	122543	140567	131555	107436	104271	105854
Receptor-type tyrosine-protein phosphatase S	G8JL96	13117.2	12786.6	12951.9	11751.1	10239.3	10995.2	9357	9225.92	9291.46	17122.3	12427.6	14775	11752.9	11113.6	11433.3	11161.7	11698.9	11430.3	9981.76	11276.8	10629.3	1160.66	8240.55	4700.61	7290.29	7406.79	7348.54	11741.3	12402.4	12071.9	1950.52	5194.54	3572.53	6177.02	5062.25	5619.63	5849.94	3619.08	4734.51	9334.17	7706.94	8520.56	13736.6	14740.5	14238.6	6983.58	7722.36	7352.97
Complement factor I	G3XAM2	47746.3	57399	52572.7	42326.7	55921.3	49124	63295.7	64887.1	64091.4	64855.5	70220.6	67538	62305.2	85420.7	73863	70245.2	62678.9	66462.1	51854	56198	54026	78375.3	69608.4	73991.8	51611.4	50773.5	51192.5	70621.8	66773.1	68697.4	103196	86384.2	94790.2	62753.2	82274.5	72513.8	76362.5	70007.4	73185	85563.8	96258.5	90911.2	48621.1	64952.9	56787	46389.6	53537.1	49963.4
Hepatocyte growth factor-like protein	G3XAK1	573.996	2110.27	1342.14	3084.38	1361.61	2223	4245.95	539.237	2392.59	4253.76	3312.45	3783.11	4961.29	4796.58	4878.93	3201.06	1585.51	2393.28	4206.35	2794.4	3500.37	5426.28	4542	4984.14	3293.45	3552.47	3422.96	3541.03	3261.74	3401.38	6500.99	6858.22	6679.6	5738.37	7038.24	6388.3	6756.57	5181.17	5968.87	5054.16	1996.61	3525.38	3943.32	1629.96	2786.64	3647.84	3173.12	3410.48
Fibulin 5, isoform CRA_a	G3XA98	29130.4	29815.7	29473	27643.9	31079.9	29361.9	21997.2	22002.3	21999.7	32040.4	31177.1	31608.8	1844.91	23460.7	12652.8	24643.2	21682.2	23162.7	31678.1	26019.4	28848.7	29457.1	26484.5	27970.8	23542.2	20104.3	21823.2	21878.8	21121.5	21500.2	14143.1	13056.2	13599.7	15151.6	16893.2	16022.4	16896.1	19022.9	17959.5	23682.4	23259.1	23470.7	25724.1	22119.1	23921.6	27902.1	19065	23483.6
Glutamate receptor 4	G3V164	21995	29334.3	25664.7	17052.1	15247.8	16150	13418.5	8338.78	10878.7	23818.1	36591.9	30205	17290.4	8399.03	12844.7	10801.7	8802.04	9801.87	14095.1	17565.8	15830.5	11843.6	11225.1	11534.3	10052.9	9406.34	9729.6	19781.9	22974	21378	4919.35	5765.59	5342.47	18967	18870.2	18918.6	14262.5	13419.9	13841.2	9653.64	9895.13	9774.39	11120	15309.5	13214.7	19571.1	19428	19499.6
Neuronal cell adhesion molecule	F8W775	415993	447045	431519	266207	237473	251840	243413	254493	248953	555108	460831	507970	281046	283405	282225	286057	278683	282370	360391	517901	439146	311348	292539	301943	134577	156837	145707	325796	345056	335426	118101	473490	295796	111451	144226	127839	100019	124989	112504	154004	366421	260213	314556	355798	335177	308239	327708	317974
Insulin-like growth factor-binding protein 6	F8VYK9	2021	2960.83	2490.92	6241.51	13798	10019.7	1450.49	5674.54	3562.52	13204.1	5166.35	9185.24	8594.08	6509.47	7551.77	9482.16	4230.91	6856.53	3589.72	6261.28	4925.5	13525.2	14524.2	14024.7	7441.51	2292.67	4867.09	1771.08	2148.14	1959.61	17493.7	20942.8	19218.3	1746.24	8799.51	5272.88	4075.52	7396.5	5736.01	7673.51	7379.82	7526.67	6412.05	5492.54	5952.3	4664.99	2815.13	3740.06
Decorin (Fragment)	F8VXZ8	20878.6	16077.3	18478	18953	20865.3	19909.1	22117	20362.4	21239.7	36448.6	42683.4	39566	15052.5	15327.6	15190	2130.28	11202.6	6666.42	23086.9	24439	23763	11822	8540.23	10181.1	14964.8	13000.6	13982.7	14907.7	20110.5	17509.1	12777.4	8624.08	10700.8	14482.2	11353.1	12917.6	13585	12636.5	13110.7	34645.9	29000.7	31823.3	13184.9	13756.9	13470.9	4199.93	22171.8	13185.8
Protein kinase C-binding protein NELL2	F8VVB6	61935.1	83318.8	72627	46682.5	59079.5	52881	42982.3	23102.7	33042.5	97989.2	91052.8	94521	68364.2	57183.1	62773.7	49326.2	61876.1	55601.1	47446.4	58918.1	53182.3	83556.3	95816.2	89686.2	33727.8	36207.1	34967.4	75401.4	76909.7	76155.6	25961.7	30049.6	28005.7	30929.6	29834.2	30381.9	31418.7	22216.1	26817.4	25910.6	33030.5	29470.5	70155.7	76994.5	73575.1	51906.9	56654.1	54280.5
Dickkopf-related protein 3	F6SYF8	43199.4	52853.4	48026.4	31412.4	27845.7	29629.1	63702.1	18676.7	41189.4	64913.8	44375.1	54644.4	49600.6	81911.4	65756	5559.21	30319.7	17939.4	27378.3	34524.3	30951.3	149894	97798.1	123846	38627.9	33168.4	35898.1	92962.5	81719.1	87340.8	48393.7	29489	38941.4	22934.5	22648.1	22791.3	58174.9	37115.1	47645	14226.5	19334	16780.3	30215.9	32606.9	31411.4	88938	51478.5	70208.3
Complement component C8 beta chain	F5H7G1	28590.9	27569.6	28080.3	34099.6	23811.8	28955.7	50934.1	51112.7	51023.4	25155.5	11859.6	18507.5	37442.9	42884.1	40163.5	35713.6	55582.2	45647.9	22415.2	38486	30450.6	63047.9	56689.3	59868.6	39322.7	32524.2	35923.5	41304.7	35760.6	38532.7	68399.2	70259.8	69329.5	27817.2	44214	36015.6	66858.5	63134.3	64996.4	36960.1	43213.8	40087	24054.7	38991.9	31523.3	28487.3	21819.4	25153.4
Complement C1r subcomponent	F5H2D0	28524.9	11064	19794.5	21578.9	14935.8	18257.4	16012.7	16073.4	16043.1	45210.9	50837.2	48024	14822.5	37065.1	25943.8	19935.5	24666.6	22301	45416	52368.1	48892	54896.5	39810.8	47353.6	17455.5	23660.7	20558.1	20252.5	13652.1	16952.3	34001.3	38476.7	36239	15414.4	9885.63	12650	20545	12003.7	16274.3	24879.9	20111.4	22495.6	9288.05	13590.7	11439.4	10996.6	31731.7	21364.1
Contactin-associated protein-like 4	F5H107	2970.73	9542.54	6256.64	1200.74	1004.61	1102.68	1849.44	1203.33	1526.38	7899.3	10788.1	9343.73	7928.4	1356.44	4642.42	1726.33	2930.24	2328.28	2961.07	7891.3	5426.19	3001.94	4132.33	3567.13	4948.65	5043.01	4995.83	4657.65	6809.34	5733.5	1816.28	2661.88	2239.08	3570.07	1668.44	2619.26	971.564	834.7	903.132	5228.54	5298.53	5263.54	6313.19	3200	4756.6	6000.22	7863.79	6932.01
SPARC (Fragment)	F5GY03	13614.5	13422.3	13518.4	15176.2	11921.8	13549	13787.8	13665.2	13726.5	19530.8	22198.6	20864.7	15830.5	16808.4	16319.4	11202.2	10725.6	10963.9	20926.4	813.367	10869.9	13848.2	2932.14	8390.14	11030.8	11821	11425.9	12293.9	13364.5	12829.2	10560.2	9859.38	10209.8	11480.2	14564.1	13022.2	9539.8	11339.1	10439.4	10789	20279	15534	11596.1	9886.16	10741.1	19561.9	15975.7	17768.8
CD166 antigen	F5GXJ9	9189.67	5125.55	7157.61	2415.76	1245.93	1830.84	2358.29	6409.21	4383.75	1505.71	15070.6	8288.14	7681.48	8380.62	8031.05	1015.24	4950.63	2982.93	1963.71	1868.66	1916.18	11030.7	968.985	5999.82	1294.06	7714.38	4504.22	8181.11	11351.8	9766.43	6940.75	5134.34	6037.55	534.026	3777.05	2155.54	3954.19	1665.69	2809.94	1159.39	2670.6	1915	9344.18	1354.57	5349.38	8394.31	8014.46	8204.39
Cathepsin B (Fragment)	E9PSG5	9591.56	14855.2	12223.4	24809.5	16714.4	20762	2773.4	10453.2	6613.3	17144.9	49136.1	33140.5	2865.59	16585.7	9725.65	3737.04	15440.4	9588.71	3239.42	11516.9	7378.18	9284.86	10357	9820.91	10355.9	10088.9	10222.4	8195.24	10823.3	9509.28	10371.5	4627.24	7499.38	4446.81	2951.95	3699.38	2480.15	10195.7	6337.92	12726.8	11346.3	12036.6	8884.37	8553.24	8718.8	11222.3	14845.4	13033.9
Thy-1 membrane glycoprotein (Fragment)	E9PNQ8	118311	127149	122730	89591.6	97460.5	93526	80692.2	85802.3	83247.2	204444	207395	205919	81924.1	69716.5	75820.3	72103.5	65870.3	68986.9	78583.9	80067.6	79325.7	156902	158689	157796	68281.6	73827.9	71054.8	148817	121849	135333	38748.4	30874.1	34811.3	53888.7	50967.3	52428	29133.3	21885.3	25509.3	46272.3	45604.8	45938.6	106907	105872	106389	167642	160839	164240
Adhesion G protein-coupled receptor B2 (Fragment)	E9PND1	15643.4	16289.6	15966.5	10757.5	9629.06	10193.3	10191.4	10162	10176.7	18122.8	14431.5	16277.1	15497.1	11689.4	13593.2	12871.2	12582.5	12726.8	11420.1	11081.1	11250.6	15787.5	14307.2	15047.4	6963.78	7009.76	6986.77	15240.9	13561.6	14401.3	5302.11	1183.54	3242.82	6369.66	6551.6	6460.63	2980.88	3656.76	3318.82	1195.92	5876.39	3536.16	12417	13300.7	12858.8	12152.2	10923.6	11537.9
Tetranectin	E9PHK0	99333.4	80500.8	89917.1	85541.4	81526.1	83533.7	96201.8	66833	81517.4	149380	148985	149183	79846.5	88316.3	84081.4	114663	95348.5	105006	91299.7	100554	95926.6	175428	169267	172347	87213.5	100577	93895.4	110611	134966	122788	102735	86122.5	94429	60855.1	70353.1	65604.1	73622.9	70824.7	72223.8	69576.7	33414.7	51495.7	95211.9	88730.2	91971.1	124934	133716	129325
Ephrin type-A receptor 4	E9PG71	43587.1	58510.8	51048.9	37150.7	26001.3	31576	18831.1	28566.3	23698.7	50718	50688.8	50703.4	29943.9	44699.8	37321.8	36073.7	37050	36561.9	35133.7	31517.2	33325.4	46452.2	36962.8	41707.5	24947.4	29450.6	27199	48127.6	49301.3	48714.5	22484.1	20670.1	21577.1	24130.1	23881.3	24005.7	20830.6	17754.5	19292.5	19510.5	13545.2	16527.9	38995	49893.6	44444.3	25384.6	51027.4	38206
Amyloid beta A4 protein	E9PG40	160595	178245	169420	171091	163660	167376	181122	179205	180163	223434	255191	239312	160389	160737	160563	126548	150823	138685	85287.6	132599	108943	120960	56660.6	88810.5	128205	128122	128164	212488	202876	207682	29605.8	36830.1	33218	116391	135514	125953	98833	65860.1	82346.6	105400	101284	103342	107467	83544.8	95506	219088	169681	194385
Macrophage colony-stimulating factor 1 receptor	E9PEK4	11750.7	13467.2	12609	11864.3	10957.1	11410.7	8823.51	9591.85	9207.68	22259.4	15264.6	18762	9996.97	12101	11049	8524.98	9179.88	8852.43	3472.26	12026.7	7749.48	18666.4	12123.3	15394.9	6478.14	6851.55	6664.85	15525.7	17170.1	16347.9	8847.39	7755.45	8301.42	9104.4	295.005	4699.7	5145.56	5973.51	5559.54	765.712	6927.5	3846.6	12870.4	21682.8	17276.6	12820.3	11006	11913.1
Adhesion G protein-coupled receptor L3	E9PBG4	1701.78	2119.25	1910.51	2858.81	1374.15	2116.48	3038.9	5186.72	4112.81	9075.32	7100.82	8088.07	4534.03	3002.6	3768.31	4759.81	4370.23	4565.02	1329.29	1439.21	1384.25	1292.43	1214.41	1253.42	1455.08	1220.73	1337.91	6975.26	5717.3	6346.28	3892.05	1696.14	2794.09	3486.38	1299.83	2393.11	1499.34	1986.99	1743.17	3524.63	1385.25	2454.94	4665.51	6339.77	5502.64	4756.84	4909.51	4833.18
Ectonucleotide pyrophosphatase/phosphodiesterase family member 2	E7EUF1	336579	327280	331929	348508	356434	352471	350116	347465	348791	447105	414449	430777	281415	293761	287588	261619	263435	262527	379597	385392	382495	288389	290255	289322	244860	268822	256841	361375	338589	349982	220655	200419	210537	245530	229967	237749	217809	213134	215472	361016	335935	348475	285307	267556	276432	440139	433867	437003
Thrombospondin-4	E7ES19	635.73	7414.44	4025.09	3948.24	6374.65	5161.44	1806	5407.42	3606.71	4499.67	9314.14	6906.9	7617.97	8012.39	7815.18	4808.8	3727.6	4268.2	8862.69	6877.57	7870.13	9671.03	6381.32	8026.17	898.9	3561.09	2230	4515.55	6588.81	5552.18	8215.09	6151.55	7183.32	1288.23	3175.54	2231.89	4246.64	4791.42	4519.03	983.519	10214.2	5598.85	1086.38	6334.33	3710.35	5190.83	6932.49	6061.66
Neurexin-1-beta	E7ERL8	36597	45987.6	41292.3	37419.2	30904.2	34161.7	27716.3	25477.4	26596.8	71423.5	73033.1	72228.3	34252.9	22348.3	28300.6	21806	27064.7	24435.4	45587.4	55230.3	50408.8	38275.3	30239.5	34257.4	29748.1	27662	28705.1	44610.5	41664.8	43137.7	16686.3	16924.9	16805.6	22400.8	27733.7	25067.2	21932.8	15736.4	18834.6	10693.5	15898.6	13296	34691.1	32262	33476.6	45518.4	40926.6	43222.5
Collagen alpha-3(VI) chain	E7ENL6	11422.2	3550.33	7486.28	6346.62	7542.21	6944.41	8764.8	7197.55	7981.18	14115.2	11324.6	12719.9	8893	2926.12	5909.56	11955.9	10074.3	11015.1	12544.4	15488.6	14016.5	5186.43	6899.02	6042.73	3330.93	9474.03	6402.48	5916.8	6292.76	6104.78	5552.35	10229.7	7891.01	6010.51	6539.23	6274.87	11420.1	5696.88	8558.49	11555.6	2723.16	7139.37	7337.1	3869.69	5603.39	2939.05	11271.6	7105.33
Neuroblastoma suppressor of tumorigenicity 1 (Fragment)	E5RFZ1	68924.1	64765.3	66844.7	49698.4	57671.4	53684.9	49396.5	58666.5	54031.5	76680	76610.5	76645.2	73501	69322.7	71411.8	59793.9	69373.5	64583.7	53412	34594.8	44003.4	68229.7	65090.7	66660.2	37170.5	46411.7	41791.1	60018.5	65511.4	62765	46677.7	41837.1	44257.4	36024.5	40307.8	38166.1	23514.5	17606.5	20560.5	35218	34534.7	34876.3	65673.7	63673.5	64673.6	59306.3	57381.2	58343.8
Vitamin D-binding protein	D6RF35	1.24865e+06	1.23619e+06	1.24242e+06	1.2883e+06	1.13524e+06	1.21177e+06	1.50999e+06	1.50007e+06	1.50503e+06	1.32592e+06	1.27104e+06	1.29848e+06	1.98683e+06	1.98482e+06	1.98583e+06	1.1818e+06	1.15732e+06	1.16956e+06	1.6972e+06	1.65656e+06	1.67688e+06	1.65245e+06	1.88852e+06	1.77048e+06	1.24255e+06	1.09124e+06	1.16689e+06	1.54726e+06	1.62602e+06	1.58664e+06	2.60015e+06	2.62602e+06	2.61308e+06	1.14939e+06	957830	1.05361e+06	1.36842e+06	1.34729e+06	1.35785e+06	1.45111e+06	1.47129e+06	1.4612e+06	1.02275e+06	1.01897e+06	1.02086e+06	1.83431e+06	1.89336e+06	1.86383e+06
Complement C1q subcomponent subunit B	D6R934	30280.6	25025.2	27652.9	35574.9	32324.2	33949.6	23703.7	17632.7	20668.2	28278.6	29861.3	29069.9	17048.2	25077.1	21062.6	13517.7	16474.5	14996.1	19924.1	14791.3	17357.7	42241.9	33696.4	37969.2	16629.3	19838.5	18233.9	27704.4	25394.7	26549.5	16926.1	18574.8	17750.4	19554.3	20174	19864.1	17811.3	15899.3	16855.3	23505.8	25975.2	24740.5	38966.8	37221.8	38094.3	17300.4	23043.9	20172.2
Alpha-2-HS-glycoprotein	C9JV77	422979	436668	429824	316504	304982	310743	454367	450029	452198	266680	332492	299586	540219	566751	553485	505625	520581	513103	448872	471895	460383	438498	406337	422418	359831	379765	369798	445398	450520	447959	825721	812420	819071	584671	619451	602061	578149	571029	574589	423131	422843	422987	319896	317376	318636	388127	396699	392413
Apolipoprotein D (Fragment)	C9JF17	1.22624e+06	1.26026e+06	1.24325e+06	1.97567e+06	2.01348e+06	1.99457e+06	1.2173e+06	1.36675e+06	1.29203e+06	1.31604e+06	1.27298e+06	1.29451e+06	1.52466e+06	1.63044e+06	1.57755e+06	1.25873e+06	1.16199e+06	1.21036e+06	1.44151e+06	1.55379e+06	1.49765e+06	1.78404e+06	1.69307e+06	1.73856e+06	1.16055e+06	1.2218e+06	1.19118e+06	1.19417e+06	1.2501e+06	1.22214e+06	1.82616e+06	1.66466e+06	1.74541e+06	1.02484e+06	1.05093e+06	1.03788e+06	1.21601e+06	1.10342e+06	1.15972e+06	1.51188e+06	1.36965e+06	1.44077e+06	1.58616e+06	1.60124e+06	1.5937e+06	1.44658e+06	1.56399e+06	1.50528e+06
Fibrinogen gamma chain	C9JEU5	217001	196790	206895	110166	115699	112933	138754	147159	142956	120146	111152	115649	257178	259576	258377	210918	210996	210957	191282	184389	187836	425609	346769	386189	90758.9	111493	101126	353172	342034	347603	397698	373201	385450	272021	283632	277826	529314	533524	531419	368305	350135	359220	212580	216132	214356	151609	148606	150108
Immunoglobulin superfamily member 8 (Fragment)	C9J8Z4	32474	36038	34256	14921.6	18717.6	16819.6	18190.2	20226.3	19208.3	48543.9	42572.1	45558	39381.6	29149.3	34265.4	37526.9	38860.8	38193.8	40850.2	33259.8	37055	23864.9	24342	24103.4	22280.1	11325.6	16802.8	30081.8	30335.4	30208.6	19077.8	14815.2	16946.5	12900.8	14873.2	13887	5226.81	13943.4	9585.11	16767	15505.2	16136.1	29486.2	30017.5	29751.8	28435.5	27369.4	27902.4
Retinoic acid receptor responder protein 2 (Fragment)	C9J8S2	3659.63	3143.04	3401.33	19632.1	3209.51	11420.8	3340.43	3207.62	3274.03	10536.3	5797.35	8166.8	1683.74	2020.35	1852.04	3202.64	2143.71	2673.18	2184.13	22285.8	12234.9	4016.9	7736.46	5876.68	8823.21	6272.99	7548.1	9174.5	4400.53	6787.51	5961.23	8524.84	7243.04	4925.4	4404.1	4664.75	2526.43	2700.43	2613.43	3685.55	4240.04	3962.79	5917.18	4460.01	5188.6	8700.77	9238.35	8969.56
Inter-alpha-trypsin inhibitor heavy chain H5	C9J2H1	32759.8	27194.7	29977.2	25221.2	15850.5	20535.8	22875.7	22422.4	22649.1	19013.8	17159	18086.4	14822.6	24826.9	19824.8	23555.9	20497.7	22026.8	20935.3	10017.7	15476.5	19180.1	20539.5	19859.8	19126.6	20564.9	19845.7	18344.6	17930.1	18137.3	12777.9	11474.9	12126.4	11294.8	18338.1	14816.4	10694.1	16881.2	13787.6	16985.9	10942.7	13964.3	21682.3	13980.2	17831.2	19109.4	22138.7	20624
Protein CutA	C9IZG4	28024.5	29944.7	28984.6	23899.8	28870.4	26385.1	26609.6	28205.7	27407.7	34930.2	35237.8	35084	18932.3	22883.5	20907.9	231.568	16782.7	8507.15	25895.7	22312.3	24104	25878.9	27829.2	26854	16441.6	19392.2	17916.9	29390.4	29434	29412.2	16617.9	15989.9	16303.9	22054.2	18537.4	20295.8	13691	15239.8	14465.4	10235.8	13085.7	11660.8	29906.7	23470	26688.3	29545.3	28268.8	28907
Malate dehydrogenase, cytoplasmic	B9A041	17518	30355.3	23936.7	23843.7	24829.5	24336.6	19169.7	17056.8	18113.3	29101.6	31425.9	30263.7	24826.6	24733.7	24780.2	21165.5	14369.5	17767.5	16395.9	17904.2	17150.1	25587.2	24362.2	24974.7	20417.1	17221.8	18819.4	24115.6	17425	20770.3	9666.44	8464.88	9065.66	10889.4	16467.7	13678.6	10405.8	13280.7	11843.3	12363.6	15337	13850.3	14697.9	22865.8	18781.9	28425.4	19381.5	23903.5
Transcobalamin-2	B5MBX2	14888.1	18830.5	16859.3	9112.86	19876.6	14494.7	5964.59	4520.17	5242.38	13731.2	1988.78	7859.99	16620.1	15490.6	16055.3	20524.9	22929.5	21727.2	11935.1	3794.44	7864.77	13075.6	14438.3	13757	8128.92	4764.18	6446.55	14045.1	13663.4	13854.3	13207.9	12206.2	12707.1	10822.8	10096.6	10459.7	12668.3	10295.1	11481.7	15876.1	10982.2	13429.2	13541.3	5355.57	9448.42	8551.58	11246.3	9898.95
Uncharacterized protein	B4E1Z4	379867	419831	399849	490675	365995	428335	505521	462292	483906	375591	348789	362190	649458	698267	673862	601824	523412	562618	342632	288512	315572	344496	377350	360923	287439	193153	240296	478439	554328	516383	877981	745584	811782	490719	574998	532859	760661	750604	755633	684434	575671	630053	480170	468686	474428	361514	393333	377423
Iduronate 2-sulfatase (Hunter syndrome), isoform CRA_e	B3KWA1	830.227	5331.88	3081.05	1188.19	2171.29	1679.74	2439.56	1668.64	2054.1	6197.46	1111.7	3654.58	815.239	306.726	560.983	1931.34	3112.7	2522.02	1815.75	2910.37	2363.06	1099.37	2843.16	1971.27	936.768	837.053	886.911	4149.06	581.014	2365.04	1626.16	835.45	1230.8	1734.49	2742.24	2238.36	904.659	1286.49	1095.57	1294.33	1387.84	1341.08	1278.24	3035.03	2156.63	1075.76	4632.25	2854
Complement factor H-related protein 1	B1AKG0	21670.6	21425	21547.8	14424.6	14632.3	14528.5	20561.4	23025.7	21793.5	26738.8	32034	29386.4	24066.3	28429.8	26248	12543.2	15786.4	14164.8	32359.9	24003.4	28181.6	43561.4	42486.7	43024.1	10995.7	8732.01	9863.87	33022.9	32798.5	32910.7	46517.3	42160.4	44338.9	17988.6	21039.8	19514.2	26794.5	23517.9	25156.2	22478.6	18905.8	20692.2	21591.1	23747.4	22669.2	32097.3	28033.3	30065.3
Mitotic spindle assembly checkpoint protein MAD2B	B1AK44	365.574	2160.86	1263.22	1507.59	1381.13	1444.36	912.004	1959.42	1435.71	632.1	382.452	507.276	2605.25	757.678	1681.47	1039.93	1174.64	1107.29	984.987	2209.39	1597.19	735.645	1063.49	899.569	498.566	909.584	704.075	589.434	617.99	603.712	654.131	675.193	664.662	1685.79	1871.42	1778.6	2197.68	1203.49	1700.59	882.527	1372.86	1127.69	919.744	1002.38	961.062	545.656	493.302	519.479
Fibulin-1	B1AHL2	136755	149692	143224	132598	133198	132898	120328	124309	122319	206630	206532	206581	121055	139210	130133	100360	107614	103987	100135	112046	106091	186528	165207	175867	100508	106173	103340	155942	138590	147266	107253	102272	104762	85810.8	80320.3	83065.6	94294.9	82081.8	88188.3	124001	113666	118833	122179	125294	123736	147517	144003	145760
Seizure 6-like protein	B0QYH5	37595.2	37531.4	37563.3	22547.2	26318.1	24432.7	22054.5	8878.43	15466.5	43922.8	39109.4	41516.1	31620.6	36483.6	34052.1	30422.5	37110.5	33766.5	28454.3	27994	28224.1	31359.2	28080	29719.6	22133.3	18919.5	20526.4	28411.2	27736.3	28073.8	11889.8	11832	11860.9	16980	10267.9	13624	10880.6	8535.82	9708.19	6040.22	17287.2	11663.7	32393.8	30474.7	31434.3	26940.4	28382.2	27661.3
Fructose-bisphosphate aldolase	A8MVZ9	37441.3	45304.9	41373.1	30074	33871.9	31973	21641.4	19991.6	20816.5	14068.1	42398.6	28233.3	36185.4	31282.7	33734	20480.9	27800.7	24140.8	25743.1	9864.05	17803.6	33128.1	40513	36820.5	19535.3	23025	21280.2	28486.4	18626.5	23556.5	19707.6	11480.1	15593.8	23022.8	7783.72	15403.2	17612.6	21644.2	19628.4	27989.8	27438.3	27714.1	30758.1	27405.3	29081.7	38981.9	31208.2	35095.1
Selenium-binding protein 1 (Fragment)	A6PVX1	28475.4	25449.8	26962.6	31912.9	30673.1	31293	15188.9	17382.2	16285.6	23420.7	24275.2	23848	16362.6	17879.2	17120.9	22129.3	23112.5	22620.9	23015.7	25342.5	24179.1	13405.2	13780.5	13592.8	11804.2	9850.09	10827.2	13503	13974.1	13738.5	1348.12	8496.95	4922.53	7244.76	9150.84	8197.8	12335.9	11138.4	11737.2	1156.26	11115.1	6135.66	28834.5	30353	29593.7	19298.5	23649	21473.8
Cathepsin D	A0A1B0GWE8	161862	165627	163745	208634	207926	208280	158864	174423	166644	232330	233748	233039	185455	188913	187184	96490.9	96742.9	96616.9	151402	149855	150628	88060.4	93531.5	90796	119109	118505	118807	134476	140379	137428	111799	96308.1	104054	168856	167333	168094	140774	135917	138346	165496	146308	155902	147927	132622	140274	254302	257283	255793
Ig mu chain C region (Fragment)	A0A1B0GUU9	203668	230367	217017	33461.8	36739.2	35100.5	70457.4	65642.1	68049.7	119635	114443	117039	28810.7	39648.1	34229.4	94151.1	92267.3	93209.2	99795.6	109474	104635	149692	123863	136777	91477.8	98198	94837.9	171939	175394	173666	152838	143490	148164	93917.8	88969.1	91443.5	219114	189700	204407	125689	130943	128316	98413.1	102242	100328	239942	286233	263087
Protein SELENOP (Fragment)	A0A182DWH7	14007.5	14762.9	14385.2	6337.83	12581.9	9459.86	9910.94	10628.8	10269.9	11759.1	13011.4	12385.3	13049.5	11858.1	12453.8	11519.1	3653.09	7586.07	10550.2	12668.7	11609.4	13890.3	11111	12500.6	10487.8	10667.7	10577.8	10022.6	9178.73	9600.68	15773.9	13600.9	14687.4	11583.7	10543.7	11063.7	13017.9	8940.18	10979	10657.3	8719.75	9688.55	9354.48	9175.31	9264.89	11901.1	10694	11297.5
Neurexin-3-beta	A0A0U1RRJ0	34310.9	33041.7	33676.3	14399.3	61121.7	37760.5	40137.1	19499.6	29818.4	59910.6	37608.8	48759.7	115503	955397	535450	716169	971475	843822	99077.6	38580.7	68829.2	36520.6	736778	386649	23015.4	19738.4	21376.9	35527.2	29204.3	32365.7	1.0956e+06	1.004e+06	1.0498e+06	693836	28327.5	361082	780747	17469.6	399108	12355.1	24065.4	18210.2	29315.1	41384.8	35349.9	20917.5	54456.7	37687.1
EGF-containing fibulin-like extracellular matrix protein 1 (Fragment)	A0A0U1RQV3	129533	148376	138954	84737.6	81066.6	82902.1	52421.2	70468.2	61444.7	124646	117725	121185	96045.8	55506.5	75776.2	49688.7	85504.4	67596.5	89901.8	102507	96204.4	174723	142974	158849	62958.4	119044	91001.4	129645	138971	134308	54432	51089	52760.5	60557.3	67888.4	64222.9	73927.1	76254.8	75091	78933	66356.6	72644.8	101529	97351.6	99440.2	143901	141832	142867
Uncharacterized protein (Fragment)	A0A0J9YY99	7728.4	2868.51	5298.46	9810.13	4022.8	6916.46	4751.53	1614.5	3183.01	40672.3	41341.8	41007	12962.4	22828.3	17895.3	23629.2	24794.4	24211.8	21711.1	18750	20230.6	58680.8	52244	55462.4	59590.7	64430.3	62010.5	31160	32608.4	31884.2	81416.5	71338.4	76377.4	18815.3	38650.4	28732.8	59677.2	26868.5	43272.8	19215	20084.3	19649.6	18833.5	16912	17872.8	25201.4	22942.2	24071.8
Uncharacterized protein (Fragment)	A0A0J9YXX1	1839.22	4083.47	2961.35	4482.23	5981.7	5231.96	7718.13	3410.08	5564.11	1479.19	972.893	1226.04	9972.76	8877.06	9424.91	1012.26	1283.55	1147.91	2438.54	2908.83	2673.69	16174.7	14464.7	15319.7	6859.25	6243.35	6551.3	8298.69	7840.21	8069.45	18278.7	17787.5	18033.1	8228.77	9063.07	8645.92	11397.2	9238.29	10317.8	7604.35	8622.98	8113.66	12707.5	11153.8	11930.6	7046.89	1336.48	4191.68
Immunoglobulin heavy variable 2-70 (Fragment)	A0A0J9YVU5	31647.8	30418.9	31033.4	31598.8	430.975	16014.9	24654.9	26831.2	25743	1757.53	3423.56	2590.55	18363.1	18494.8	18429	39981.8	38625.7	39303.7	2708.34	3171.46	2939.9	1550.48	3391.04	2470.76	46439.9	47218.9	46829.4	604.944	1606.84	1105.89	84005.5	78420.9	81213.2	33519.1	36511.5	35015.3	54658.2	57737.4	56197.8	1811.97	2768.29	2290.13	26040.8	30979.3	28510.1	10761.4	905.102	5833.28
Ig alpha-2 chain C region (Fragment)	A0A0G2JMB2	1626.1	3141.88	2383.99	870.554	5415.8	3143.18	553.726	608.67	581.198	4277.51	2215.99	3246.75	11623.4	12072.3	11847.9	1481.86	5529.33	3505.59	9369.51	1757.75	5563.63	561.312	2944.25	1752.78	9368.86	6391.81	7880.34	8740.73	7269.57	8005.15	1274.73	13274	7274.39	5088.57	716.488	2902.53	24453.5	23139.1	23796.3	32554.6	31955.5	32255.1	1644.99	5080.54	3362.76	1276.81	5458.08	3367.44
Immunoglobulin kappa variable 1-9	A0A0C4DH69	2869.31	3378.75	3124.03	5613.59	3240.48	4427.03	5071.63	5942.66	5507.14	10749.7	10290.1	10519.9	18564.4	15613	17088.7	4336.92	6017.96	5177.44	4767.17	2926.63	3846.9	17903.3	14540.5	16221.9	30890.8	23915.7	27403.3	7638.56	6409.72	7024.14	14247	15985.2	15116.1	2699.72	16965.5	9832.6	12307.5	14812.1	13559.8	1407.89	14472.2	7940.03	9560.79	14926.5	12243.6	13768.3	17763.9	15766.1
Protein IGHV3-35 (Fragment)	A0A0C4DH35	2520.44	1558.98	2039.71	1707.41	930.751	1319.08	4562.49	6730.84	5646.66	5619.15	9069.62	7344.38	1479.1	5630.99	3555.05	2914.5	3496.59	3205.55	1691.93	2649.27	2170.6	28979.2	25956.8	27468	29843.1	24701.4	27272.2	9860.95	11391.7	10626.3	34081.1	27638.2	30859.6	4101.68	3930.72	4016.2	2092.33	1061.8	1577.06	6919.32	4070.82	5495.07	3762.26	4784.01	4273.13	16292.3	15597.3	15944.8
Cartilage acidic protein 1	A0A0C4DFP6	185296	181038	183167	153684	147978	150831	136244	123918	130081	176734	182902	179818	179335	169105	174220	148023	156047	152035	150253	95344	122799	134262	149457	141860	95380.6	98303.4	96842	173589	183200	178394	64209.5	65442.2	64825.9	85673	84978.5	85325.7	77573.5	68293.9	72933.7	94174.4	88178.5	91176.5	159939	169366	164653	144433	139695	142064
Protein IGHV1-69-2 (Fragment)	A0A0B4J2H0	8147.73	9100.27	8624	13195.7	11212.4	12204	18633.4	16117.4	17375.4	25931.5	26322	26126.7	15382.2	4170.79	9776.52	11507.6	6720.35	9113.98	10469.4	15561.4	13015.4	63784.6	61655.7	62720.1	37329.7	37040.7	37185.2	19324.2	21707.8	20516	67082.3	58202	62642.2	17004.2	17093.5	17048.9	19830.5	17350.7	18590.6	22698.5	16773.6	19736	20582.5	19892.6	20237.5	25179.1	23492.8	24335.9
Protein IGHV3OR16-9 (Fragment)	A0A0B4J2B5	19283.3	1701.9	10492.6	27309.5	26787.3	27048.4	41477.8	33342.1	37409.9	86631	94518.8	90574.9	36157.8	47876.9	42017.4	35411.6	38876.1	37143.8	47366.8	54121.6	50744.2	276510	219817	248164	200208	212017	206113	92824.1	109482	101153	374030	349638	361834	35026.3	38199.7	36613	46502.6	50688.4	48595.5	59916.5	52379.4	56147.9	56676.5	54951.6	55814	151180	158998	155089
Immunoglobulin lambda-like polypeptide 5	A0A0B4J231	21382	23265.6	22323.8	34936.9	37086.2	36011.5	19057.8	20727.9	19892.8	50166.2	47915.2	49040.7	52353.7	49543.4	50948.5	75099.1	80691.8	77895.5	90383.4	94136.6	92260	27893.7	23659.1	25776.4	27542.2	23627.2	25584.7	22502.8	17144.3	19823.6	28326.9	17745.5	23036.2	20072.9	18252.7	19162.8	22690.8	40292.8	31491.8	42621.8	47038.4	44830.1	34925.5	32596.9	33761.2	25954.2	25312.1	25633.1
Immunoglobulin heavy variable 3-15	A0A0B4J1V0	58797.5	68144.4	63471	124143	104965	114554	100780	109024	104902	84508.4	84937	84722.7	102510	113390	107950	118330	111604	114967	117279	122976	120127	190063	176144	183104	149391	157202	153297	100596	102347	101472	200445	202225	201335	89001.9	94886.1	91944	207493	194340	200916	170368	162176	166272	155923	178121	167022	135543	121971	128757
Immunoglobulin heavy variable 6-1	A0A0B4J1U7	76026.9	11106.9	43566.9	4667.77	43142	23904.9	1160.55	4266.37	2713.46	35651.9	30321.6	32986.7	14760.6	3743.84	9252.2	156556	5950.87	81253.6	39534.5	2741.24	21137.9	21957.8	219900	120929	46028.5	51120.7	48574.6	131127	1228.05	66177.7	64446.7	20003.5	42225.1	25389	30301.3	27845.2	40833.9	25796.9	33315.4	20839.3	30825.6	25832.4	22003.8	18279.6	20141.7	38414.6	39750.5	39082.6
UPF0764 protein C16orf89	A0A0A0MT71	5719.08	15668.5	10693.8	15820.1	8838.88	12329.5	13019	16808.8	14913.9	18182.9	13374.3	15778.6	13733.3	10834.2	12283.8	15297.6	16406.8	15852.2	34594.4	17104.3	25849.4	18421.5	29356.6	23889	10640	11954.8	11297.4	10569.1	15748.3	13158.7	10328.8	5197.76	7763.28	15872.4	12577.9	14225.2	9282.98	11979.8	10631.4	11077.3	16519.5	13798.4	17305.1	17234.5	17269.8	6553.66	6812.62	6683.14
Secretogranin-1 (Fragment)	A0A0A0MT66	9245.2	13424.1	11334.7	7998.55	1572.65	4785.6	10391.8	13877.5	12134.7	11054.3	15461.5	13257.9	21719.2	23281.2	22500.2	11654.4	3135.1	7394.76	13822	9711.72	11766.9	5304.37	2186.91	3745.64	12320	15655.4	13987.7	9755.26	11478.2	10616.7	3660.18	6984.75	5322.46	3811.12	7535.07	5673.1	4631.02	5939.31	5285.17	8813.73	7634.04	8223.89	7821.89	8533.32	8177.6	360.101	6827.57	3593.84
Immunoglobulin heavy variable 3-49	A0A0A0MS15	989.509	3636.95	2313.23	2569.3	2123.56	2346.43	6287.31	9846.53	8066.92	12058	2160.22	7109.1	10227.2	11233.5	10730.3	19167	17348.6	18257.8	3705.98	3634.19	3670.08	11724.1	14117.5	12920.8	1203.02	272.232	737.628	11946	8957.07	10451.5	36521.5	30550.9	33536.2	14046.7	14455.7	14251.2	24876.3	20937.3	22906.8	3111.05	15916	9513.51	13486.8	2363.18	7925	1877.62	19355.2	10616.4
Ig delta chain C region (Fragment)	A0A0A0MS09	2583.36	1468.95	2026.15	1834.74	1654.51	1744.62	2809.2	1018.66	1913.93	808.187	3275.96	2042.07	1813.67	1184.46	1499.07	698.699	11654.6	6176.64	1075.83	2603.81	1839.82	2098.84	1894.76	1996.8	3194.16	1464.69	2329.42	1065.23	1001.29	1033.26	1284.54	1185.19	1234.87	837.602	2123.93	1480.77	1097.12	1118.03	1107.57	2243.82	2832.36	2538.09	2356.38	6471.16	4413.77	1314.43	1392.05	1353.24
Coagulation factor V	A0A0A0MRJ7	12374.7	14225.8	13300.2	16920.7	7725.41	12323.1	5715.94	19058.9	12387.4	4181.07	18145	11163.1	19689.3	15530.2	17609.8	16886.3	15312.8	16099.5	21159.3	26690.4	23924.8	5928.57	12418.6	9173.56	14299.4	13982.2	14140.8	14895.2	18140.7	16517.9	13309.1	17738.5	15523.8	13535.1	14482.4	14008.8	22856.7	14008.7	18432.7	18054.8	16182.2	17118.5	13940.7	15959.4	14950.1	7525.73	19763.8	13644.7
Testican-1	A0A0A0MQX7	8399.78	12567.7	10483.8	14131.4	9927.96	12029.7	763.096	342.734	552.915	13535	13456.7	13495.8	939.561	7516.4	4227.98	1475	6593.99	4034.5	7054.52	9358.11	8206.32	5135.07	6159.57	5647.32	7614.3	4529.49	6071.9	7369.73	8984.15	8176.94	1239.23	4998.43	3118.83	4971.98	5506.35	5239.16	7932.97	5406.91	6669.94	5312.35	2664.11	3988.23	6146.36	4562.74	5354.55	9642.81	10219.7	9931.27
Neural cell adhesion molecule 1 (Fragment)	A0A087X1V2	773.984	3438.32	2106.15	488.035	564.262	526.148	991.438	1705.64	1348.54	1008.46	1193.08	1100.77	1515.45	2540.09	2027.77	1144.31	826.32	985.317	1853.78	2272.66	2063.22	2094.39	449.822	1272.11	7175.12	1827.84	4501.48	450.57	825.514	638.042	2584.03	552.682	1568.35	813.527	894.864	854.196	2872.43	3504.03	3188.23	2467.27	5356.46	3911.87	2861.15	687.904	1774.53	657.888	2151.83	1404.86
Glutathione peroxidase	A0A087X1J7	35185.3	38744.2	36964.8	29759.5	46813.8	38286.6	36138.2	29506.4	32822.3	46151.4	25299.6	35725.5	54006	42086.1	48046	59028.5	31653.6	45341.1	4590.19	33386.6	18988.4	40463.5	40340.7	40402.1	31502.3	8069.66	19786	36078.1	32464.7	34271.4	47666.7	43441.1	45553.9	31317.3	31440.4	31378.8	43142.4	29775.4	36458.9	37487.8	39798.5	38643.2	36092.4	42853.5	39472.9	45544.6	50264.9	47904.8
Collagen alpha-1(VI) chain	A0A087X0S5	149532	150218	149875	137573	133231	135402	98176.3	103532	100854	195487	177287	186387	85674.1	101543	93608.5	95306.9	92299.4	93803.1	148402	149635	149018	118995	99139.1	109067	79621.6	87338.5	83480	133918	126431	130174	95852.5	64431.2	80141.8	90551.5	100841	95696.1	91805.4	85907.9	88856.6	85802	96787.3	91294.6	116702	112208	114455	122284	128666	125475
Neural cell adhesion molecule L1-like protein	A0A087X0M8	369395	387005	378200	268644	278219	273432	271432	270859	271146	400605	392226	396415	390662	392837	391749	342195	330489	336342	270125	321912	296018	344646	299540	322093	143995	159022	151508	303496	287262	295379	139697	126477	133087	148665	157536	153101	127453	116328	121891	156652	155179	155915	341354	300318	320836	307072	292240	299656
Seizure 6-like protein 2	A0A087WYL5	8593.47	1788.68	5191.07	1357.28	1660.15	1508.71	1742.75	2028.14	1885.44	9781.94	10137.6	9959.79	6982.27	5804.18	6393.22	7745	8041.96	7893.48	6621.58	6729.38	6675.48	8782.12	5907.7	7344.91	1206.75	5145.89	3176.32	6516.93	6240.46	6378.7	873.802	3688.26	2281.03	3132.51	879.748	2006.13	5459	3499.38	4479.19	840.18	4571.06	2705.62	8725.91	11144.4	9935.14	9842.17	6160.72	8001.45
IgGFc-binding protein	A0A087WXI2	304816	295170	299993	159064	190393	174728	48897.7	56795.1	52846.4	157583	153653	155618	163134	151905	157520	124625	137257	130941	132001	132691	132346	295143	251812	273477	81417.9	83208.4	82313.2	260806	273392	267099	261609	246994	254302	97336.5	99583.8	98460.1	140737	135811	138274	197926	162772	180349	191745	188338	190042	116296	99991.4	108144
Neural cell adhesion molecule 1	A0A087WX77	127553	122871	125212	89136	96315.4	92725.7	67683.2	84818.5	76250.9	227606	188186	207896	138863	161682	150273	110139	106403	108271	139247	139376	139311	119253	102704	110978	71145.1	79165.4	75155.3	75094.8	72574.3	73834.6	46134.4	45809	45971.7	45963.5	40507	43235.2	28412.7	48548.5	38480.6	59115.5	63922.3	61518.9	111630	93042.8	102336	111311	114676	112994
Nuclear receptor subfamily 2 group C member 1	A0A087WUK4	19850.9	19871.6	19861.2	24878.1	22852.5	23865.3	14094.6	18269.7	16182.2	62852.3	68644.5	65748.4	22501.2	16864.3	19682.7	40682.5	47025.1	43853.8	31110.3	12853.9	21982.1	61622.2	57517.6	59569.9	97411.9	92692.7	95052.3	50114.6	44705.8	47410.2	53473	46410.6	49941.8	23527.3	25136.9	24332.1	29852.3	30254.8	30053.5	41575.1	41961.2	41768.2	33691.7	35246.5	34469.1	90484.5	94520	92502.3
Roundabout homolog 1	A0A087WTM1	2061.09	1163.41	1612.25	3559.05	2894.48	3226.77	5434.98	2185.38	3810.18	5141.67	7192.12	6166.9	1701.82	5072.72	3387.27	5900.14	1756.86	3828.5	1948.08	1683.83	1815.95	2916.83	3224.88	3070.86	1336.83	3077.68	2207.25	4459.01	3527.23	3993.12	2523.52	7214.59	4869.05	1499.56	3410.71	2455.13	2945.43	2592.15	2768.79	775.118	2952.05	1863.58	4817.67	3566.45	4192.06	867.945	4343.97	2605.96
Carboxypeptidase B2	A0A087WSY5	15365.9	11021.7	13193.8	14355.6	5729.11	10042.3	13512.7	20909.1	17210.9	13026.3	2543.57	7784.91	19652.4	22891.6	21272	19269	12725.3	15997.1	8878.58	5684.88	7281.73	25496.7	26101.1	25798.9	15733.6	11883.2	13808.4	15655.5	11003.3	13329.4	23708.5	13426.7	18567.6	2384.88	9691.69	6038.28	15401.1	12621.9	14011.5	15620.7	7644.66	11632.7	11086.6	9533.52	10310.1	12161.1	14523.3	13342.2
Protein IGHV3OR16-12 (Fragment)	A0A075B7B8	5551.76	5540.5	5546.13	9003.72	9789.96	9396.84	6185.08	8876.6	7530.84	26438	22801.1	24619.5	11194.9	10873.1	11034	11855.5	11484	11669.8	14576.8	13296.5	13936.7	50264.2	45552.3	47908.2	56340	54475	55407.5	14218.5	18788.3	16503.4	69403.7	65595.9	67499.8	9687.13	9601.71	9644.42	11728.3	9868.16	10798.2	13840.6	13390.4	13615.5	11668.3	13128.3	12398.3	54782.5	54947	54864.8
Protein IGKV2D-24 (Fragment)	A0A075B6R9	9373.85	7555.29	8464.57	10558.9	10231	10395	18189.9	15609	16899.4	11661.1	12529.7	12095.4	23837	26093.7	24965.3	15647.3	16001.4	15824.3	18355.6	17130.1	17742.8	26614.2	25081.8	25848	21979	22823.3	22401.1	12367.1	13064.2	12715.7	41287.4	39041.4	40164.4	23823.2	25685.2	24754.2	28641.8	27776.6	28209.2	6590.46	8609.14	7599.8	19479.6	18947.6	19213.6	9656.65	9169.28	9412.97
Ig gamma-3 chain C region (Fragment)	A0A075B6N8	946.972	1616.66	1281.82	1625.19	2057.68	1841.44	814.339	2109.4	1461.87	1153.44	1416.37	1284.91	1084.09	1022.38	1053.23	2828.74	2380.37	2604.56	2914.6	914.185	1914.39	9401.1	2146.17	5773.64	2016.88	5101.72	3559.3	1006.13	1763.87	1385	3614.01	5843.01	4728.51	707.172	1747.08	1227.13	2396.62	2755.28	2575.95	1204.04	1177.6	1190.82	1474.04	1950.01	1712.02	1501.26	2680.35	2090.81
Ig lambda-3 chain C regions (Fragment)	A0A075B6L0	3058.58	3576.29	3317.43	7298.7	7869.25	7583.97	2607.54	4555.66	3581.6	7248.24	6139.34	6693.79	4171.78	5670.08	4920.93	7119.16	8318.12	7718.64	6374.58	8412.56	7393.57	7121.3	5022.91	6072.11	4197	544.282	2370.64	2730.85	2923.5	2827.18	6996.55	6931.79	6964.17	5553.13	5387.02	5470.08	3743.19	4088.41	3915.8	4830.24	6892.61	5861.43	10479.4	6851.29	8665.33	2498.88	3574.86	3036.87
Alpha-1-antitrypsin	A0A024R6I7	47582.7	15069.1	31325.9	982.893	813.095	897.994	1569.32	2248.08	1908.7	1949.48	946.137	1447.81	1451.17	965.939	1208.55	2916.6	2575.81	2746.2	34905.6	55058.1	44981.9	39002.4	41987.5	40494.9	3635.59	1497.89	2566.74	1716.2	973.774	1344.99	3817.85	807.906	2312.88	2021.02	1472.49	1746.75	84844.1	71484.9	78164.5	59367.3	53881.1	56624.2	2827.99	1098.08	1963.04	37469.1	6156.49	21812.8
Biognosys Std	52	3.00602e+07	3.09319e+07	3.0496e+07	2.93896e+07	2.94669e+07	2.94283e+07	3.14311e+07	3.19496e+07	3.16903e+07	2.61392e+07	2.68334e+07	2.64863e+07	2.43207e+07	2.499e+07	2.46553e+07	1.90147e+07	1.87953e+07	1.8905e+07	3.16485e+07	3.20256e+07	3.18371e+07	1.11474e+07	1.54408e+07	1.32941e+07	2.21908e+07	2.33562e+07	2.27735e+07	2.16599e+07	2.20747e+07	2.18673e+07	1.77456e+07	1.59922e+07	1.68689e+07	2.07358e+07	2.09994e+07	2.08676e+07	1.63652e+07	1.57785e+07	1.60718e+07	3.02447e+07	2.94866e+07	2.98657e+07	2.86577e+07	2.86416e+07	2.86496e+07	2.59533e+07	2.63393e+07	2.61463e+07
Bovine Pancreatic Trypsin	51	13813.3	23208	18510.7	14996.9	13023.4	14010.1	40574	17026.1	28800	789964	782131	786048	11692.2	27061.4	19376.8	17245.6	4213.38	10729.5	17779.1	34618.5	26198.8	1.1812e+06	1.03402e+06	1.10761e+06	1.08906e+06	1.11918e+06	1.10412e+06	273358	279960	276659	831820	768022	799921	17413.3	6801.73	12107.5	12056.5	7029.24	9542.87	26341.4	30295.7	28318.6	29334.2	18829.5	24081.9	1.36201e+06	1.36823e+06	1.36512e+06
Porcine Trypsin	39	19378.1	21158.4	20268.2	23532	29377.6	26454.8	25023.3	25426.5	25224.9	22037.7	32429.9	27233.8	16048.3	18202.1	17125.2	17062.2	25100.2	21081.2	31026.9	33730.9	32378.9	5104.88	17161.8	11133.3	26673.6	18421	22547.3	17093.3	29365.4	23229.4	24269	23697.5	23983.3	15974.4	15017.5	15495.9	12370.7	16237.9	14304.3	23930.5	16401.9	20166.2	20014.6	25127.6	22571.1	28427.8	46393.1	37410.4
Human Keratin K2E	16	2833.54	2677.17	2755.35	5638.52	1579.14	3608.83	2837.59	1689.61	2263.6	2938.08	1396.03	2167.05	2092.15	6799.77	4445.96	2247.01	3223.51	2735.26	2451.41	4499.33	3475.37	4714.31	4567.39	4640.85	1243.12	3050.83	2146.98	3960.54	4921.57	4441.05	8044.33	2638.29	5341.31	1163.52	776.022	969.772	2166.41	2328.33	2247.37	4237.74	4163.76	4200.75	2960.83	1499.09	2229.96	3381.72	1916.41	2649.06
Bovine Serum Albumin	1	364160	346281	355221	486514	363291	424903	457039	375898	416468	1.35647e+06	943223	1.14984e+06	783306	1.09967e+06	941489	1.08966e+06	1.00386e+06	1.04676e+06	910579	1.05821e+06	984397	2.28718e+06	1.45411e+06	1.87065e+06	409417	1.30624e+06	857827	765027	662707	713867	1.78475e+06	603316	1.19404e+06	558312	318549	438431	475991	322873	399432	501782	443307	472545	449304	483704	466504	807048	366284	586666
[truncated: 48 more columns]
